# Supplementary material for: Ferrocenylimine Palladium (II) Complexes: Synthesis, Characterization and Application in Mizoroki-Heck and Suzuki-Miyaura Cross-Coupling Reactions
Source: MDPI journal article supplement (doi:10.3390/catal11070755), 2021-06-22
Supplement: s1 [file s1]

Archive with 1 entries (1 files):
- catalysts-1225625-supplementary.pdf
