# Supplementary material for: Ferrocenylimine Palladium (II) Complexes: Synthesis, Characterization and Application in Mizoroki-Heck and Suzuki-Miyaura Cross-Coupling Reactions
Source: MDPI journal article supplement (doi:10.3390/catal11070755), 2021-06-22
Supplement: s1 [file s1 › catalysts-1225625-supplementary.pdf]

*Supplementary Materials*

# Ferrocenylimine Palladium (II) Complexes: Synthesis, Characterization and Application in Mizoroki-Heck and Suzuki-Miyaura Cross-Coupling Reactions

Asanda C. Matsheku <sup>1</sup>, Richard Tia <sup>2</sup>, Munaka C. Maumela <sup>1</sup> and Banothile C. E. Makhubela <sup>1,\*</sup>

<sup>1</sup> Centre of Synthesis and Catalysis, Department of Chemical Sciences, University of Johannesburg, P.O. Box 524, Auckland Park 2006, Johannesburg, South Africa; mtsasa002@myuct.ac.za (A.C.M.); cmaumela@uj.ac.za (M.C.M.)

<sup>2</sup> Department of Chemistry, Kwame Nkrumah University of Science and Technology, Kumasi, Ghana; richardtia.cos@knust.edu.gh

\* Correspondence: bmakhubela@uj.ac.za ; Tel.: +27-11-559-3782

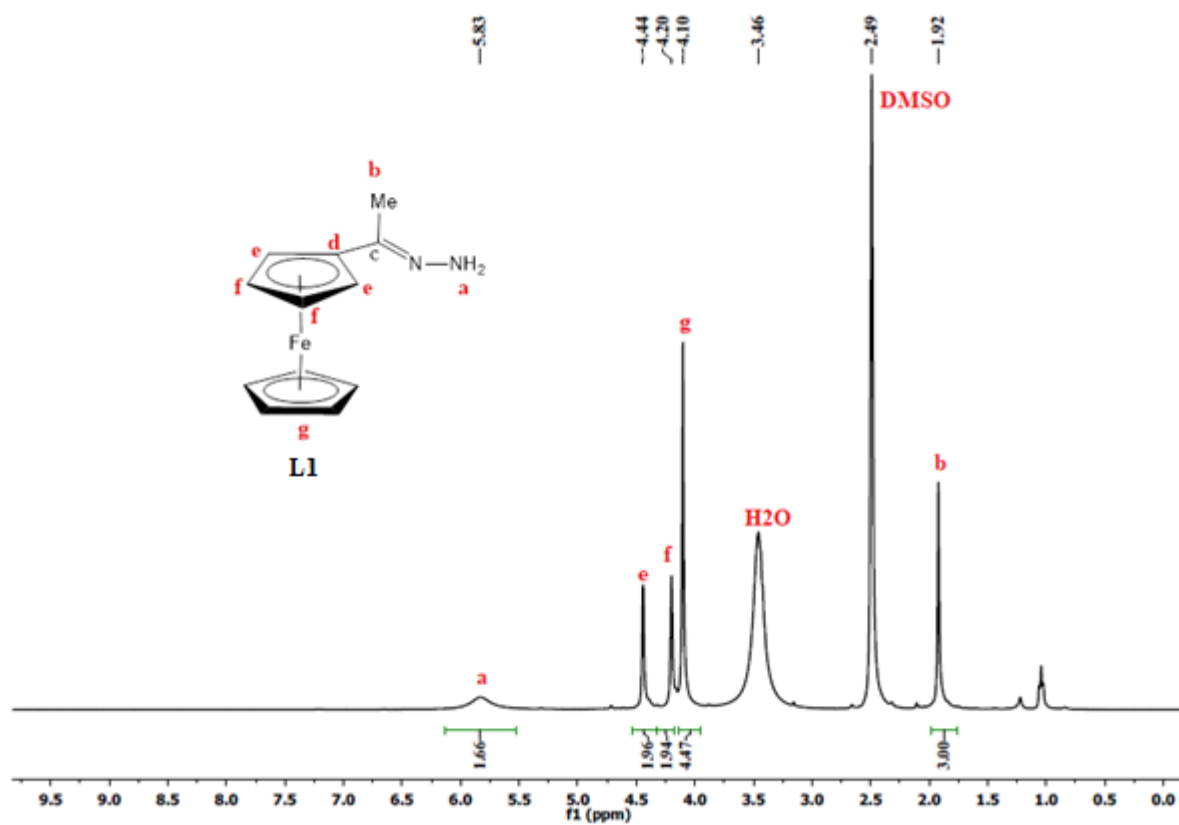

Figure S1:  $^1\text{H}$  NMR spectrum of ferrocenyl hydrazone **L1**, recorded in  $\text{DMSO-}d_6$  at  $25^\circ\text{C}$ .

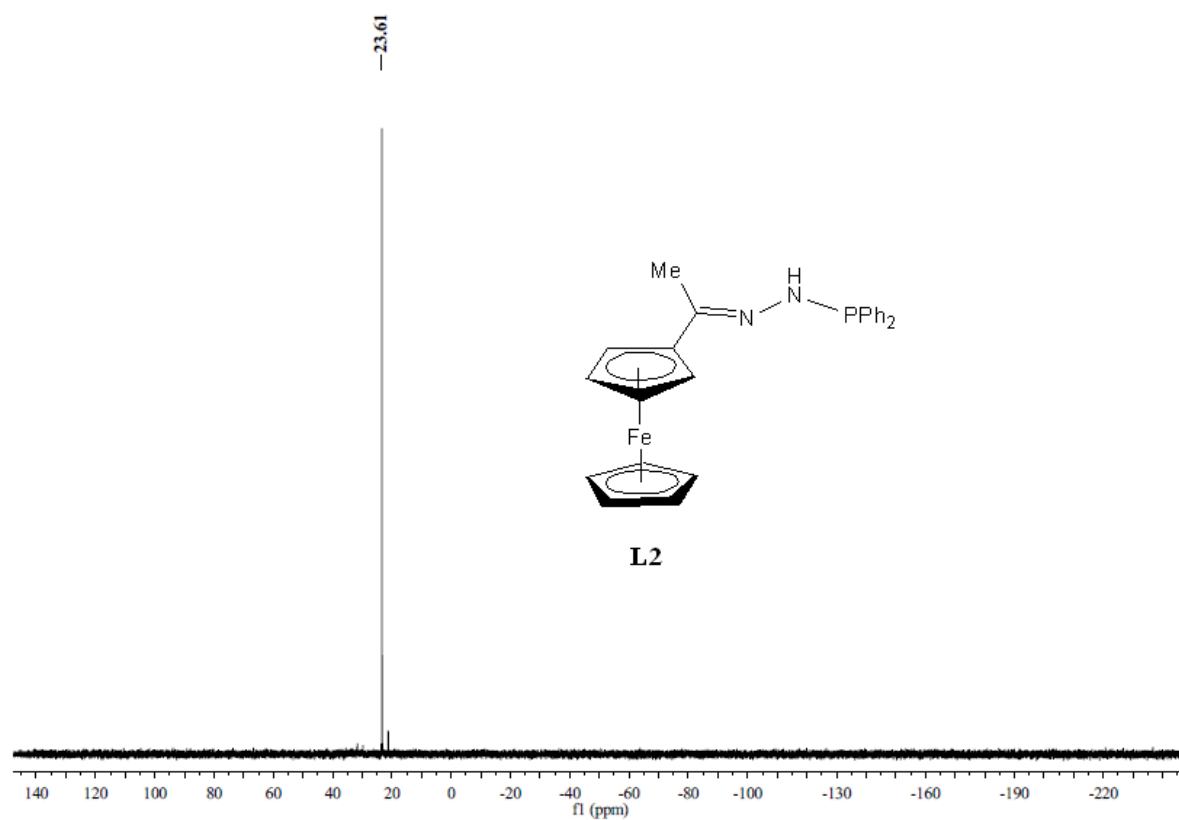

Figure S2:  $^{31}\text{P}$  NMR spectrum of **L2**, recorded in  $\text{CDCl}_3$  at  $25^\circ\text{C}$ .

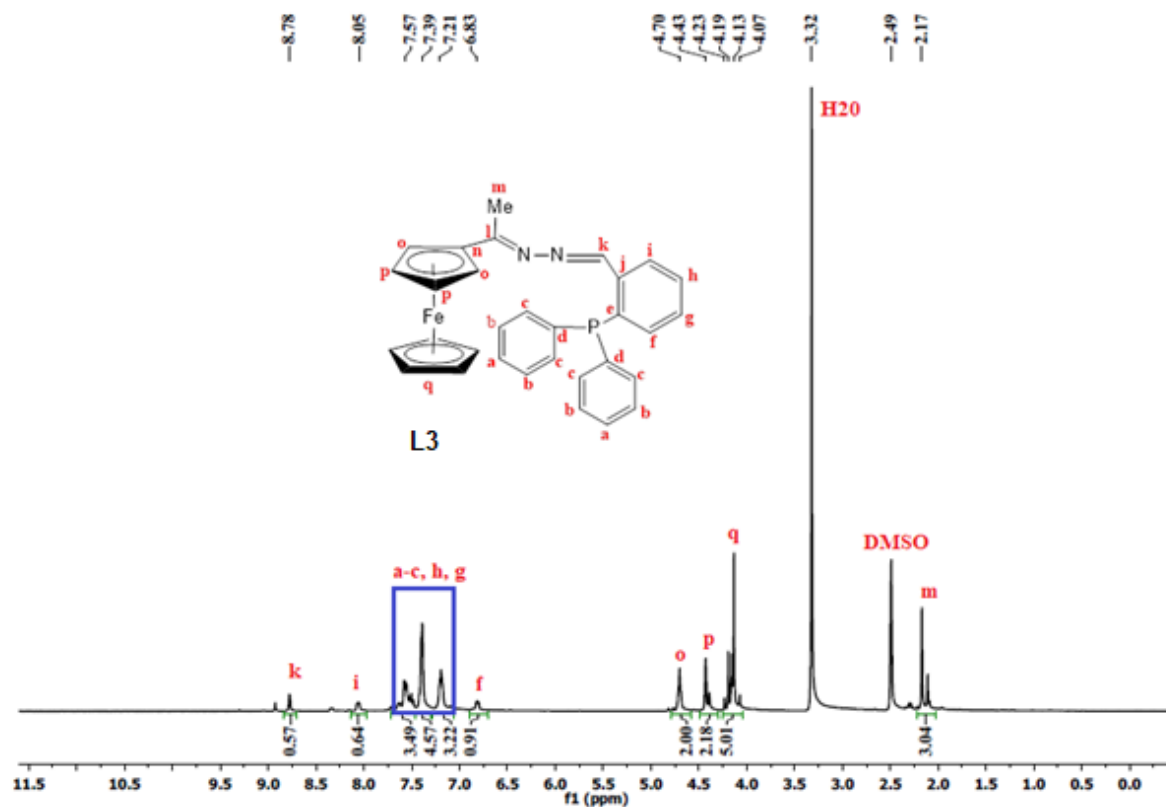

Figure S3: <sup>1</sup>H NMR spectrum of **L3**, recorded in DMSO-d<sub>6</sub> at 25 °C.

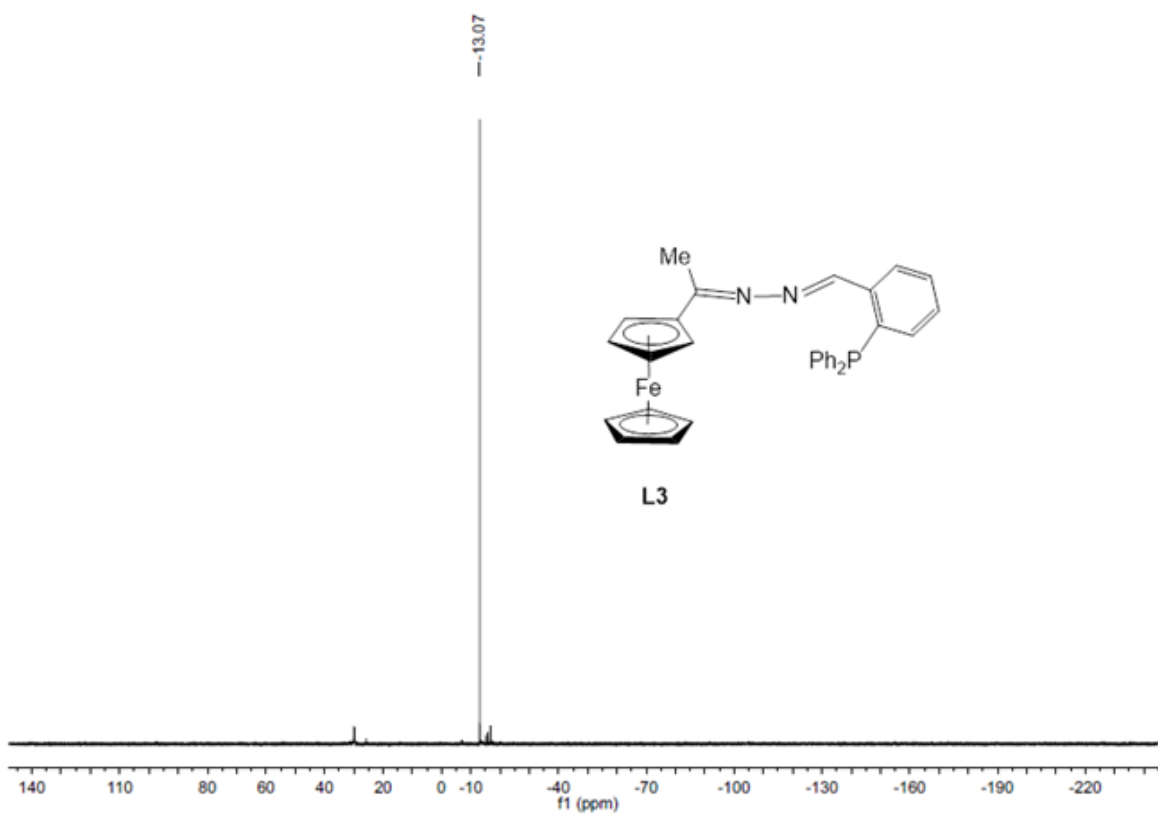

Figure S4: <sup>1</sup>P NMR spectrum of **L3**, recorded in DMSO-d<sub>6</sub> at 25 °C.

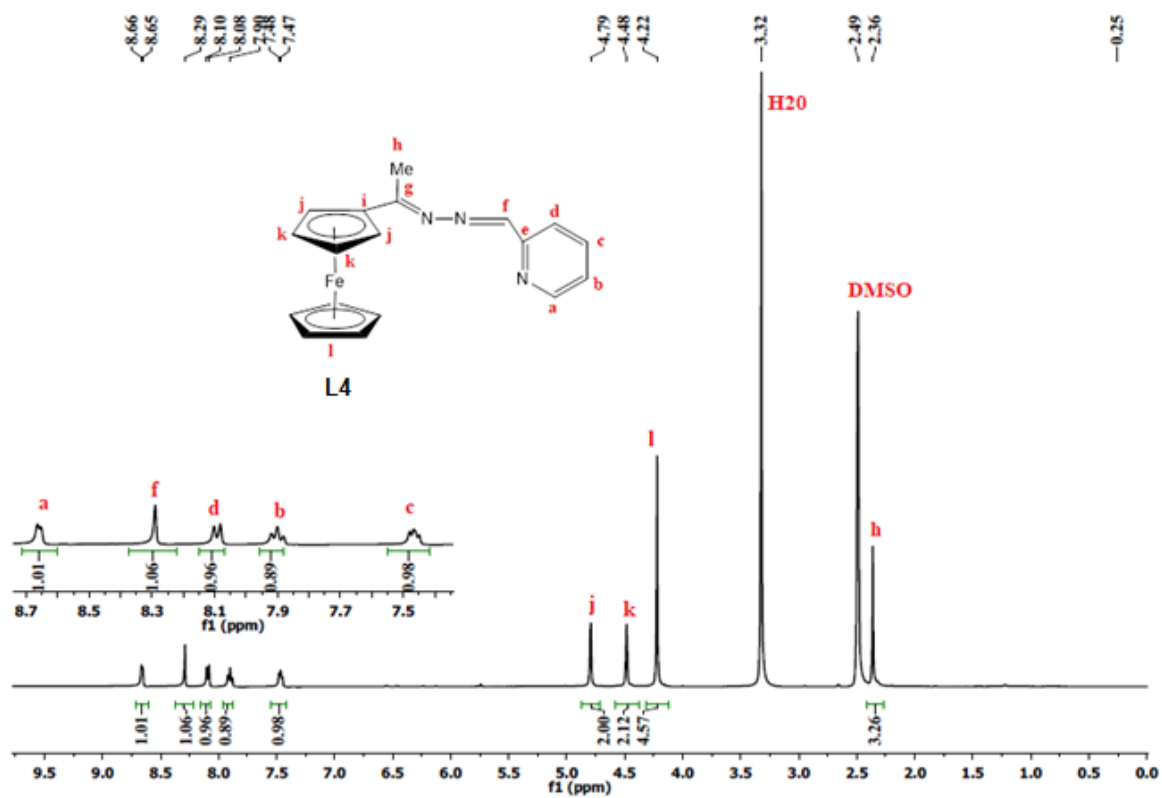

Figure S5:  $^1\text{H}$  NMR spectrum of **L4**, recorded in  $\text{DMSO-d}_6$  at  $25^\circ\text{C}$ .

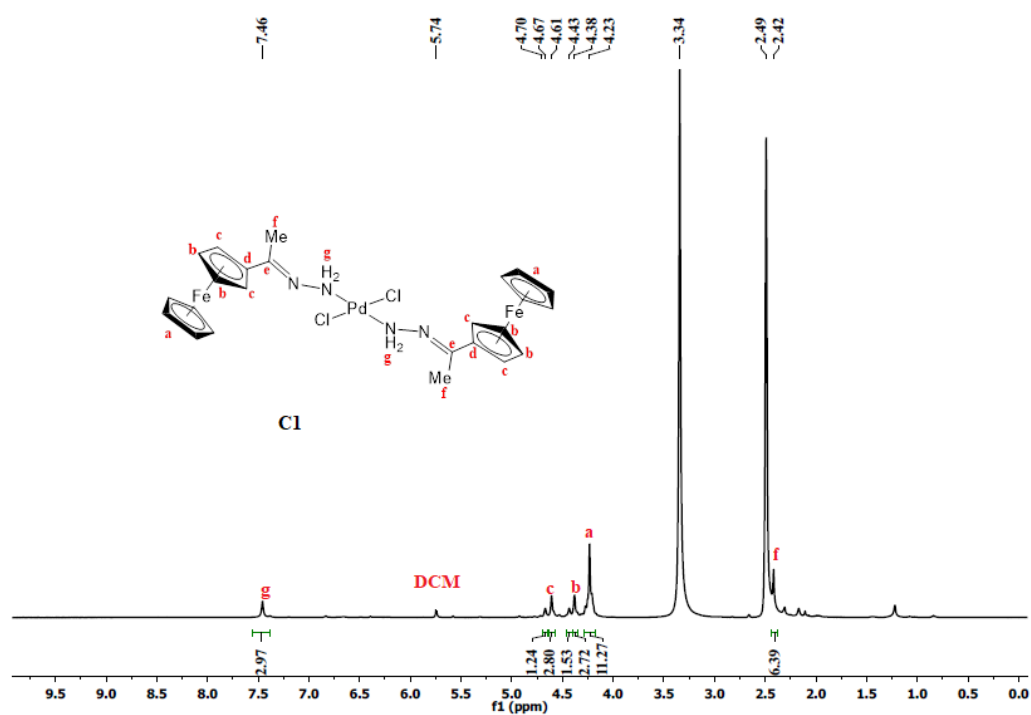

(a)

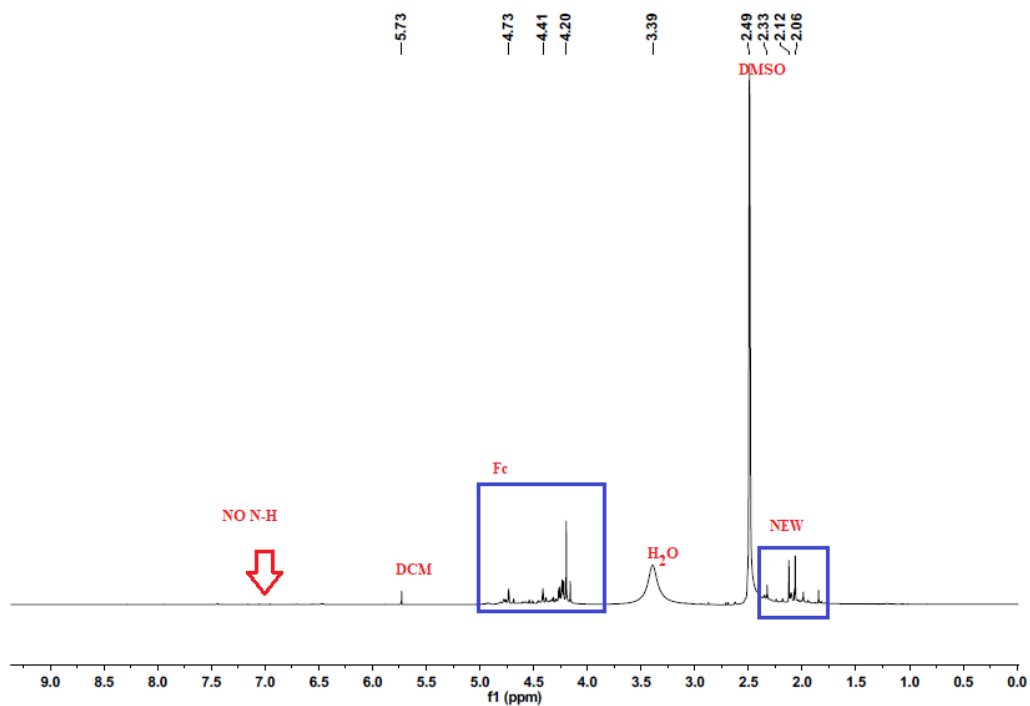

(b)

**Figure S6:** <sup>1</sup>H NMR spectrum of dichlorobis(ferrocenyliminehydrazone)palladium(II) complex **C1**, recorded in DMSO-d<sub>6</sub> at 25 °C (a); <sup>1</sup>H NMR spectrum of **C1** after four hours in room temperature, recorded in DMSO-d<sub>6</sub> at 25 °C (b).

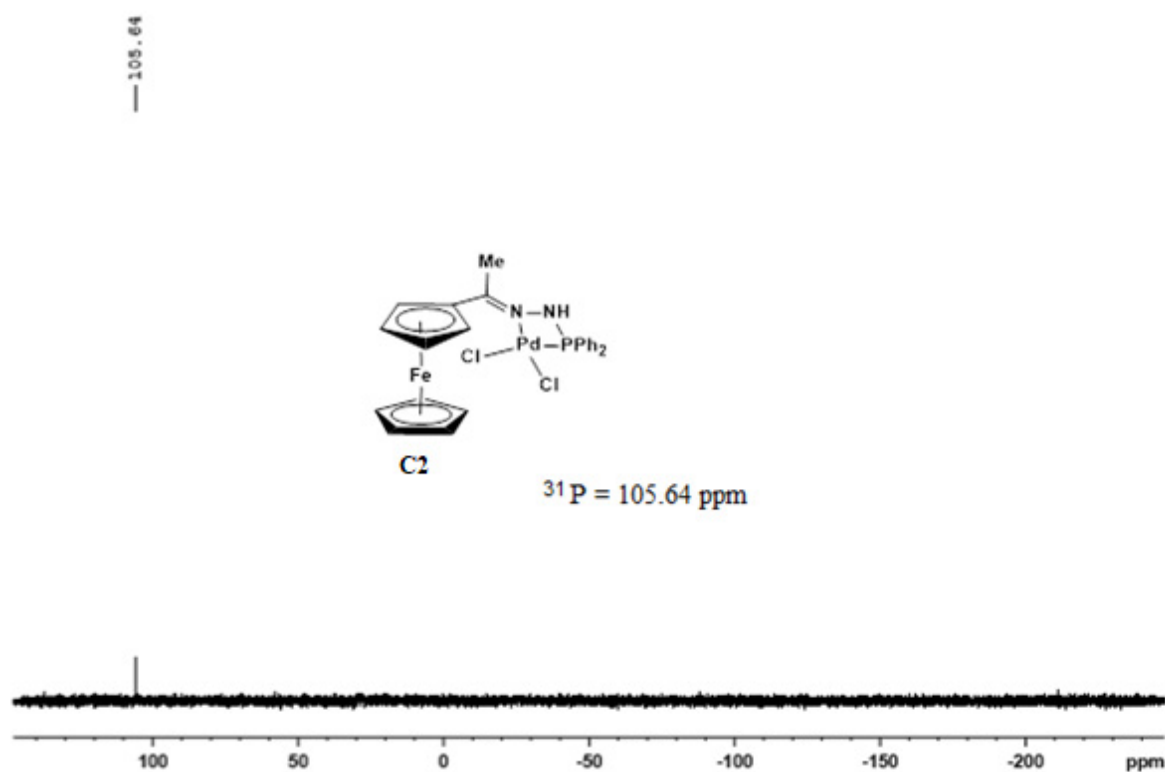

**Figure S7:**  $^{31}\text{P}\{^1\text{H}\}$  NMR spectrum of **C2**, recorded in DMSO- $d_6$  at 25 °C.

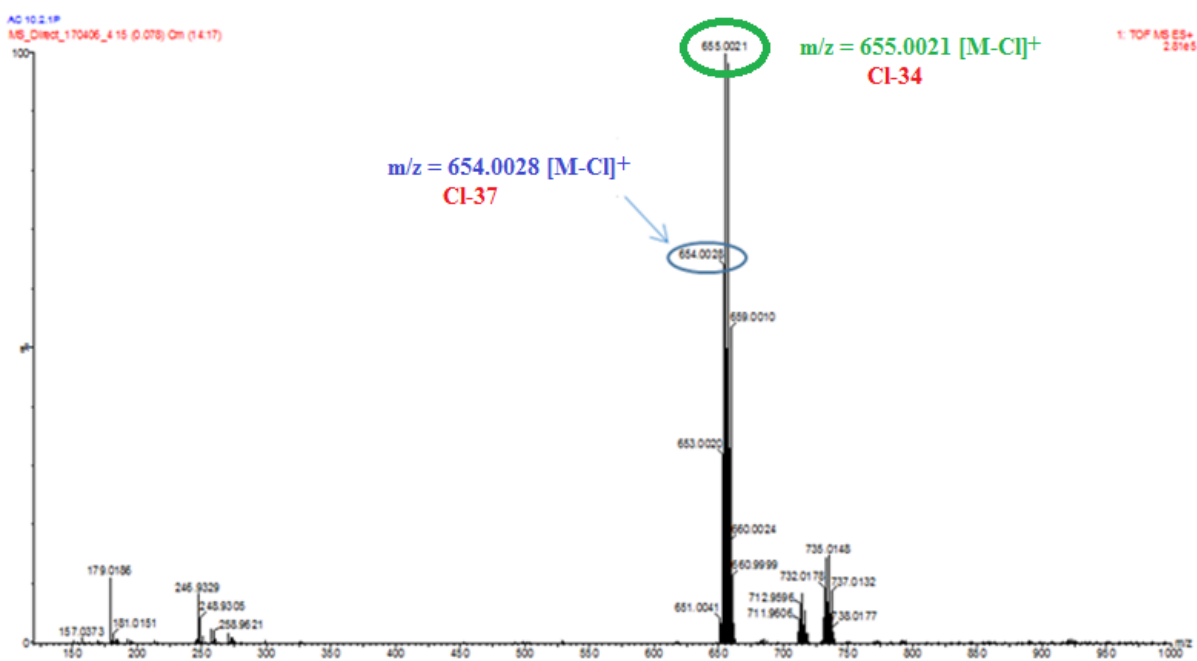

**Figure S8:** High resolution electrospray ionisation mass spectrum of **C3**, recorded in the positive mode.

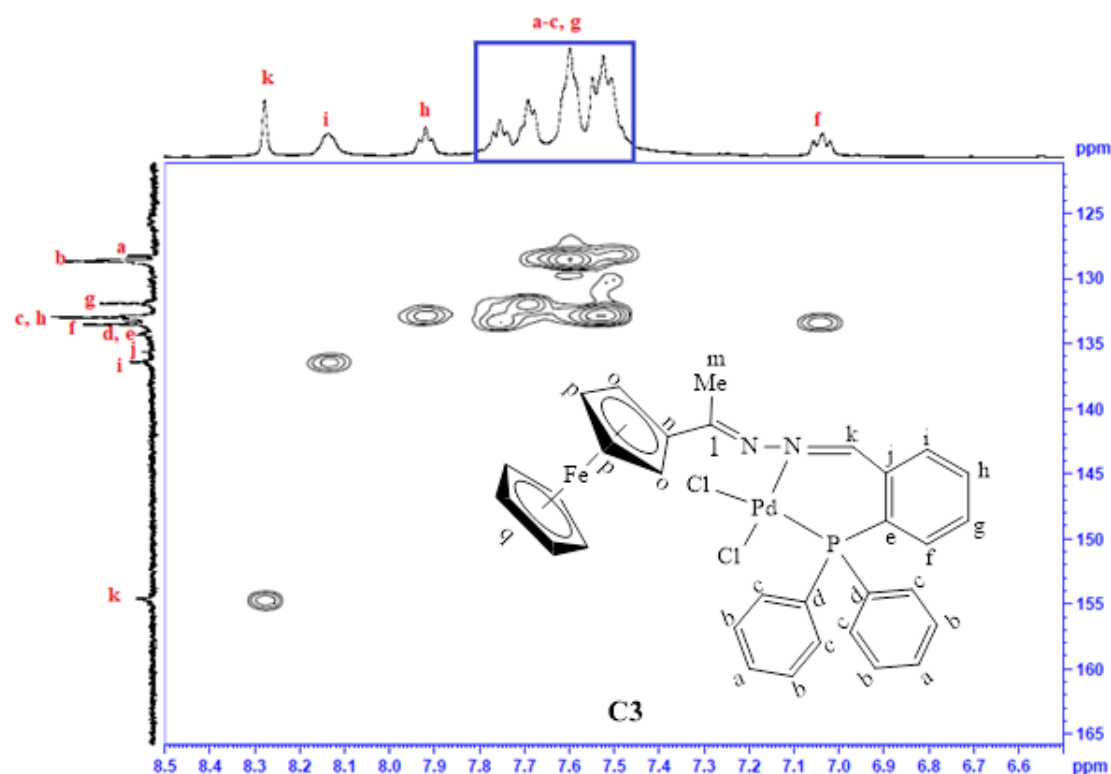

Figure S9: The HSQC 2D NMR of C3 showing the region  $-\text{CHArPPh}_2$ , recorded in DMSO- $d_6$  at 25 °C.

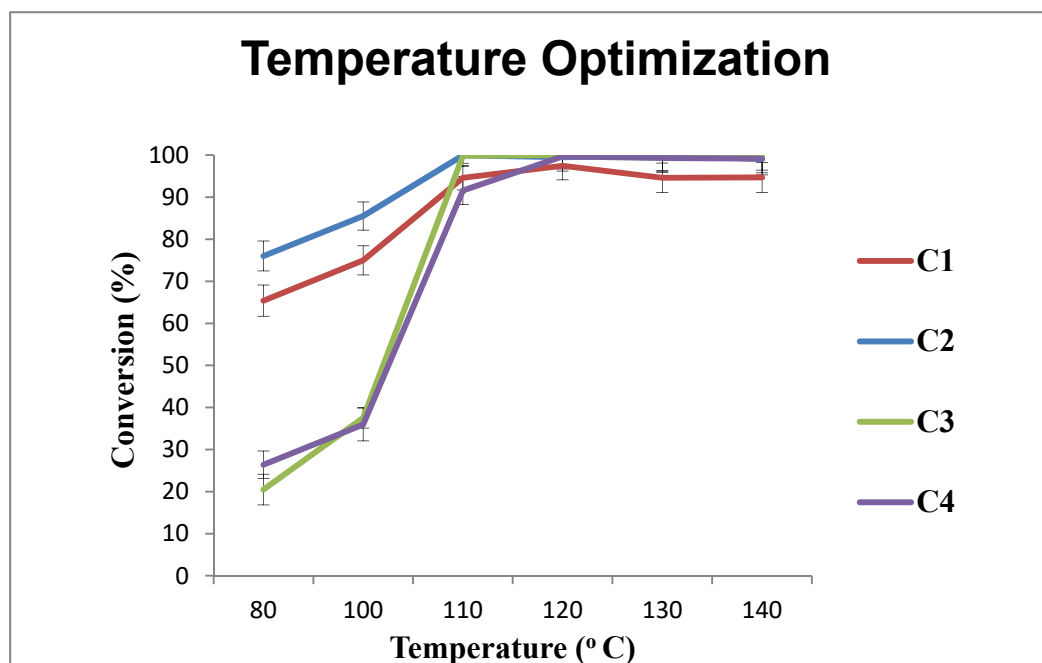

Figure S10: Temperature optimization in Mizoroki-Heck cross-coupling reactions carried out using C1 – C4 as catalyst precursors. **Reaction conditions:** Temperature optimization. Reactions carried out in DMF (1.2 mL) with 0.66 mmol iodobenzene, 0.726 mmol of styrene, 1.32 mmol of Et<sub>3</sub>N and 0.5 mol % Pd catalyst loading using *n*-decane as internal standard and the reactions were allowed to run for 4 hours.

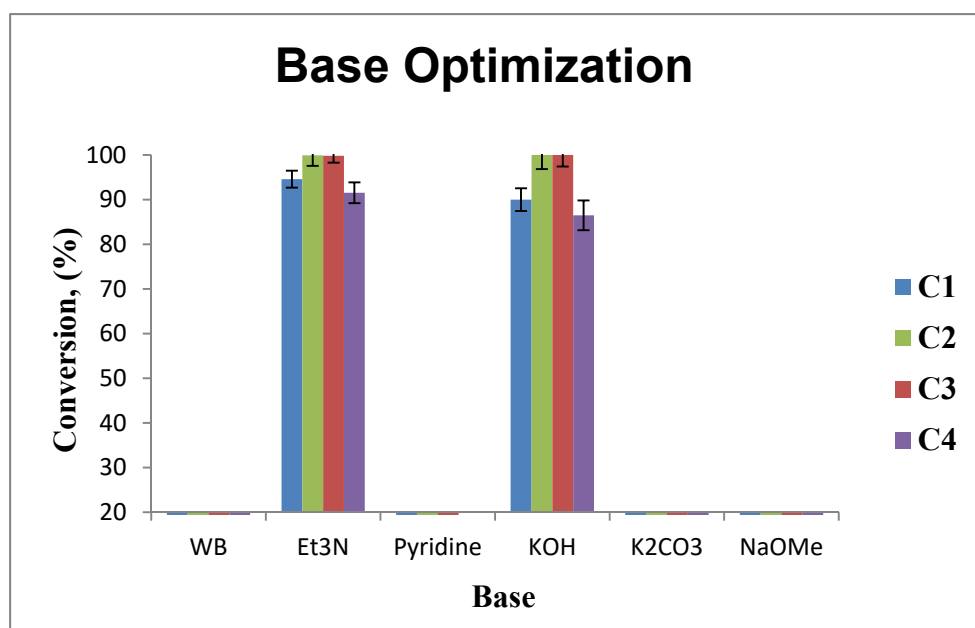

**Figure S11:** Base optimization in Mizoroki-Heck cross-coupling reactions carried out using (pre)catalysts **C1-C4**, **WB** = Without Base. **Reaction conditions:** Reactions carried out in DMF (1.2 mL) with 0.66 mmol iodobenzene, 0.726 mmol of styrene, 1.32 mmol of base and 0.5 mol % Pd catalyst loading (**C1 – C4**). The *n*-decane was used as internal standard and the reactions were allowed to run for 4 hours at 110 °C.

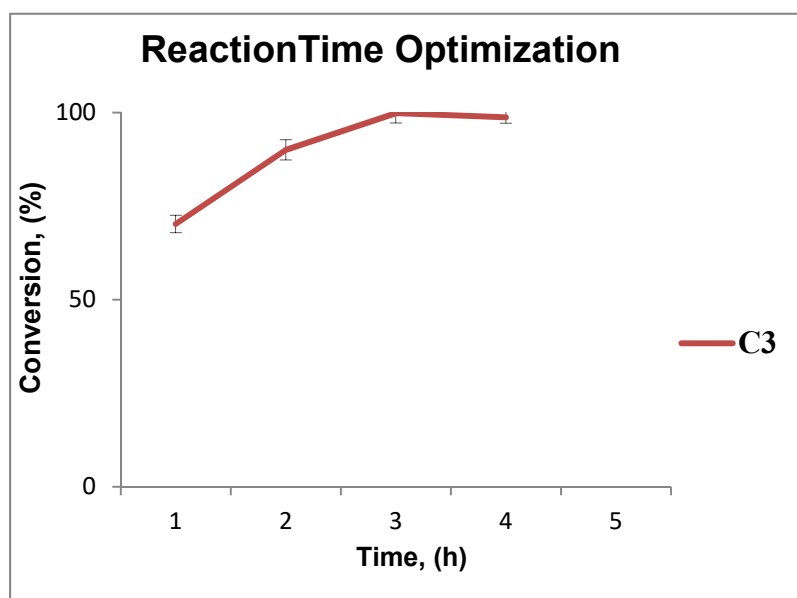

**Figure S12:** Time optimization in the Mizoroki-Heck cross-coupling reaction carried using (pre)catalyst **C3**, also includes effect of reaction time on TOF. **Reaction conditions:** Reaction time optimization using **C3**. Reactions carried out in DMF (1.2 mL) with 0.66 mmol iodobenzene, 0.726 mmol of styrene, 1.32 mmol of Et<sub>3</sub>N and 0.5 mol % Pd catalyst loading using *n*-decane as internal standard and the reactions were allowed to run for 1-4 hours.

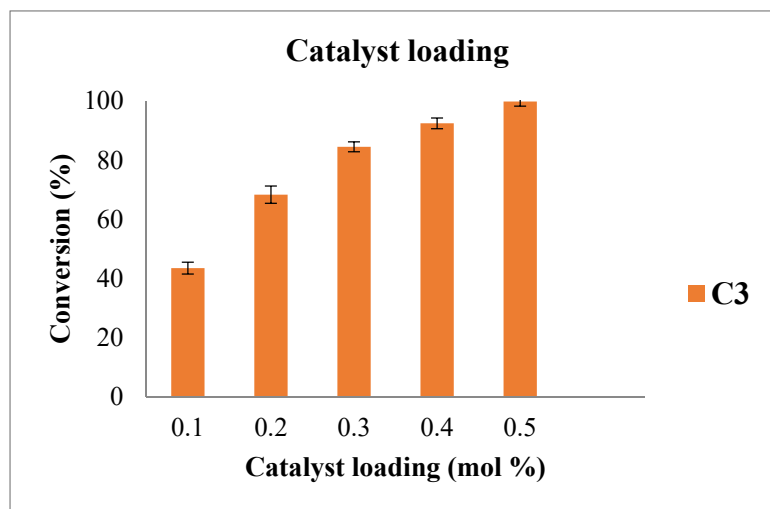

**Figure S13:** Optimization of catalyst loading in the Mizoroki-Heck cross-coupling reaction carried out (pre)catalyst **C3**.

**Reaction conditions:** Catalyst loading optimization using **C3**. Reactions carried out in DMF (1.2 mL) with 0.66 mmol iodobenzene, 0.726 mmol of styrene, 1.32 mmol of Et<sub>3</sub>N and 0.1-0.5 mol % Pd catalyst loading using *n*-decane as internal standard and the reactions were allowed to run for 3 hours at 110 °C.

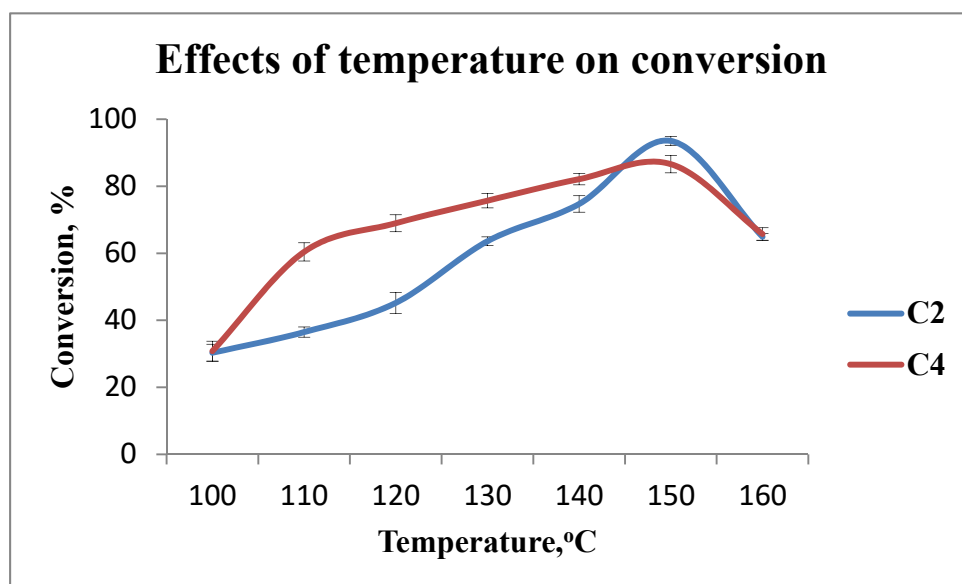

**Figure S14:** Temperature optimization in Suzuki-Miyaura cross-coupling reactions carried out using **C2** and **C4** as catalyst precursors. **Reaction conditions:** Reactions carried out in DMF (1.2 mL) with 0.67 mmol of bromobenzene, 1.06 mmol of phenylboronic acid, 1.33 mmol of KOH and 0.5 mol % Pd catalyst loading using *n*-decane as internal standard and the reaction was allowed to run for 3 hours at 150 °C.

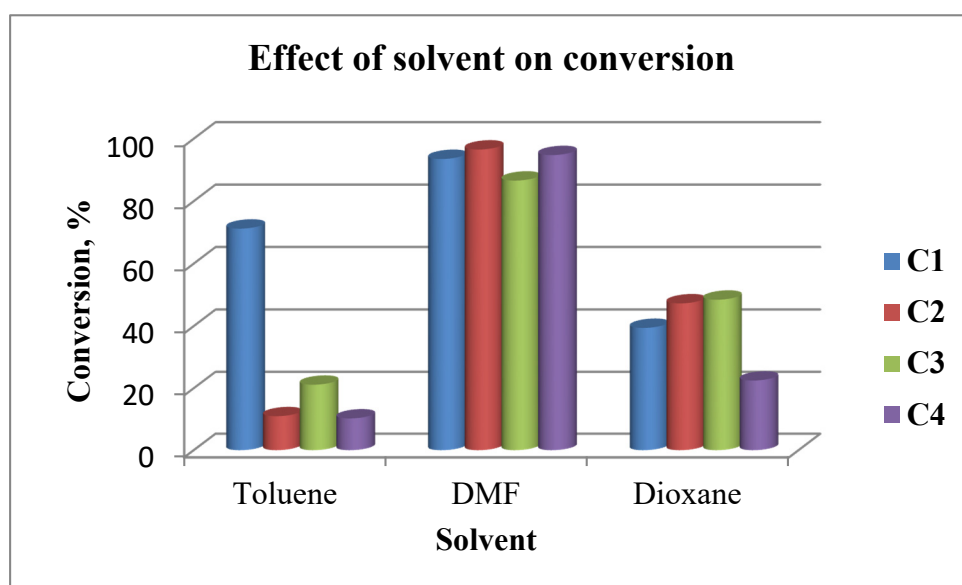

**Figure S15:** Solvent variation in Suzuki-Miyaura cross-coupling reactions carried out using pre-catalysts C1 – C4.

**Reaction conditions:** Reactions carried out in 1.2 mL (DMF/ Dioxane/ Toluene) with 0.67 mmol of bromobenzene, 1.06 mmol of phenylboronic acid, 1.33 mmol of KOH and 0.5 mol % Pd catalyst loading using *n*-decane as internal standard and the reaction was allowed to run for 3 hours at 150 °C (C1 – C4).

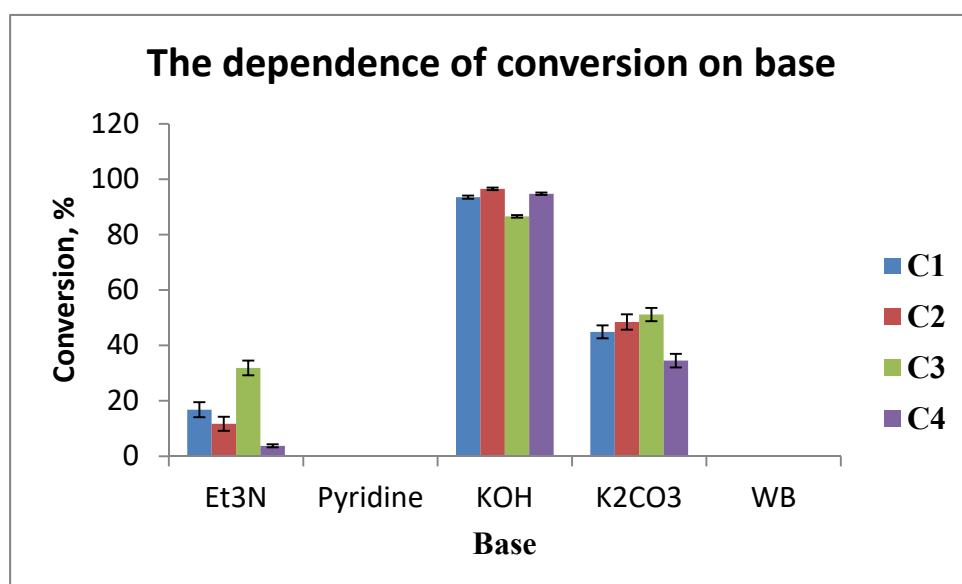

**Figure S16:** Base optimization in Suzuki-Miyaura cross-coupling reactions carried out using pre-catalysts C1-C4, WB =

Without base. **Reaction conditions:** Reactions carried out in DMF (1.2 mL) with 0.67 mmol of bromobenzene, 1.06 mmol of phenylboronic acid, 1.33 mmol of (KOH/ pyridine/ KOH/ K2CO3) and 0.5 mol % Pd catalyst loading using *n*-decane as internal standard and the reaction was allowed to run for 3 hours at 150 °C (C1 – C4).

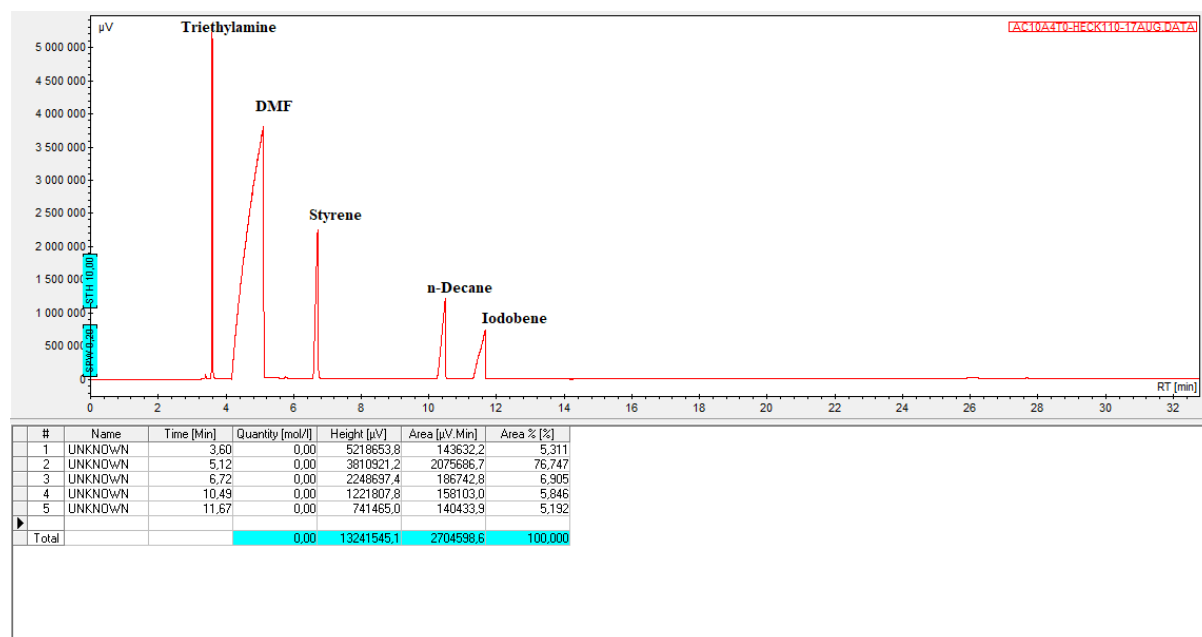

**Figure S17:** A representation of the gas chromatogram before the Mizoroki-Heck cross-coupling reaction of iodobenzene with styrene.

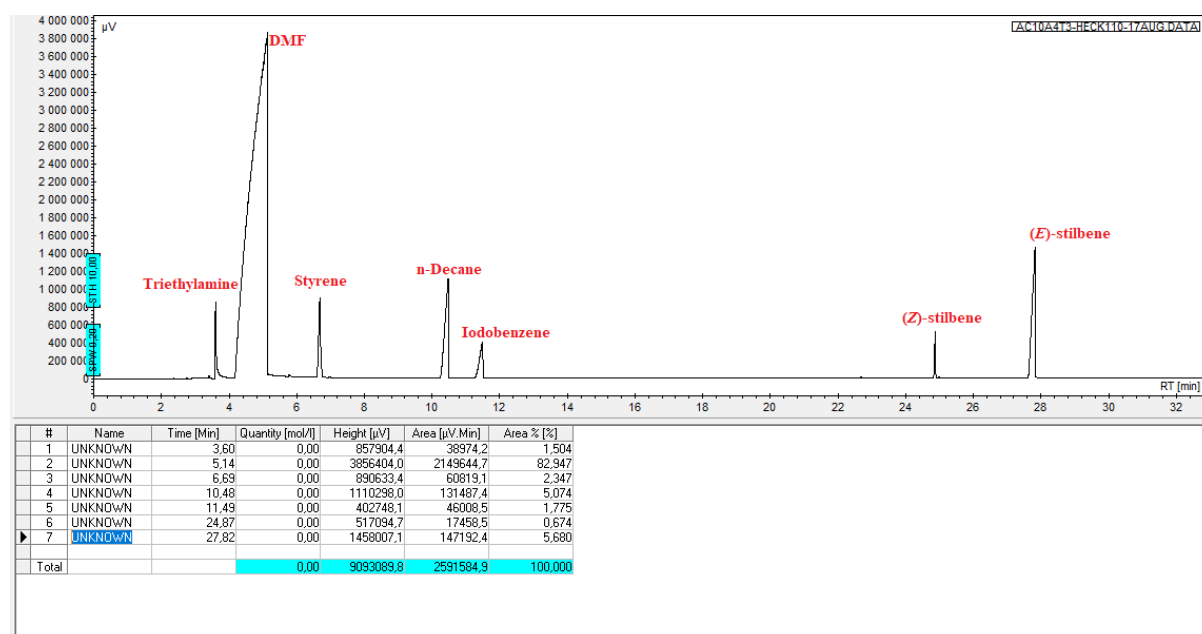

**Figure S18:** A representation of the gas chromatogram after 3 hours of the Mizoroki-Heck cross-coupling reaction of iodobenzene with styrene.

## CROSS-COUPLING PRODUCTS NMR

1. Mizoroki-Heck cross-coupling reactions product NMR spectra ( $^1\text{H}$  and  $^{13}\text{C}\{^1\text{H}\}$ )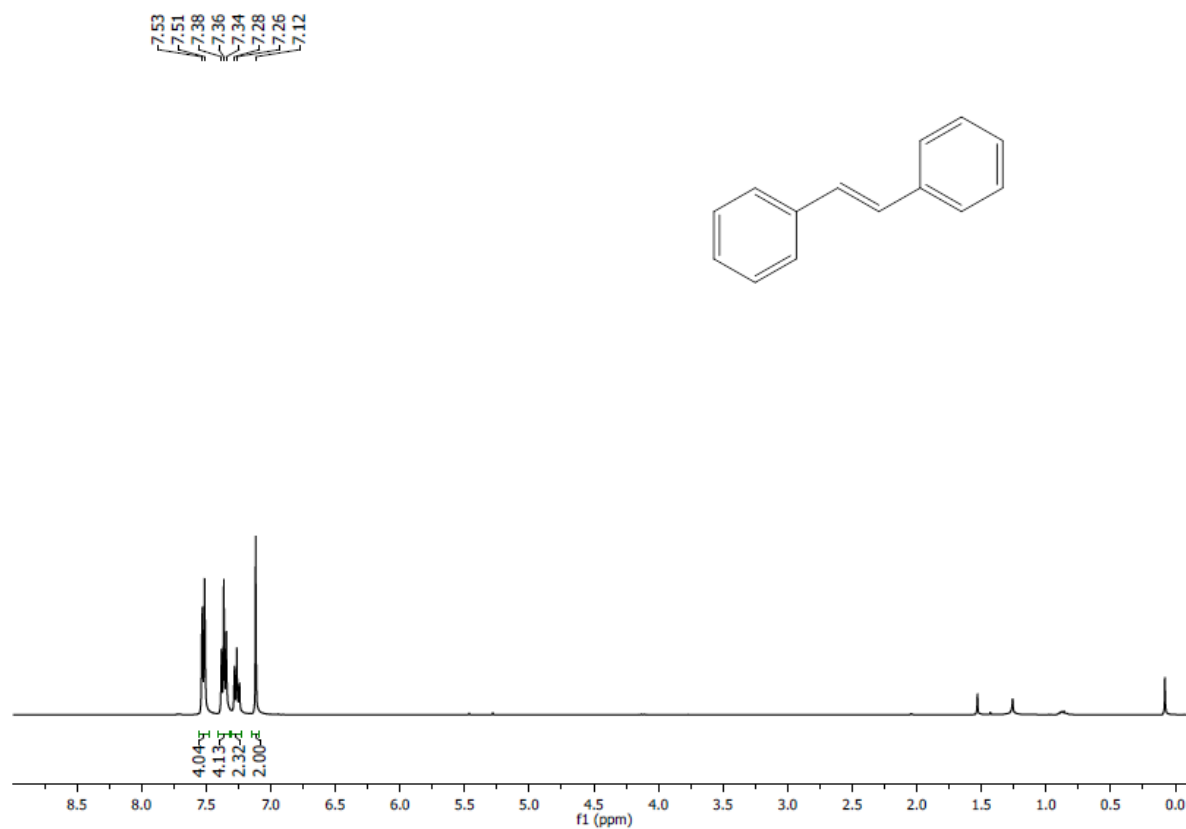

**Figure S19:**  $^1\text{H}$  NMR spectrum of **stilbene**, recorded in  $\text{CDCl}_3$  at 25 °C.

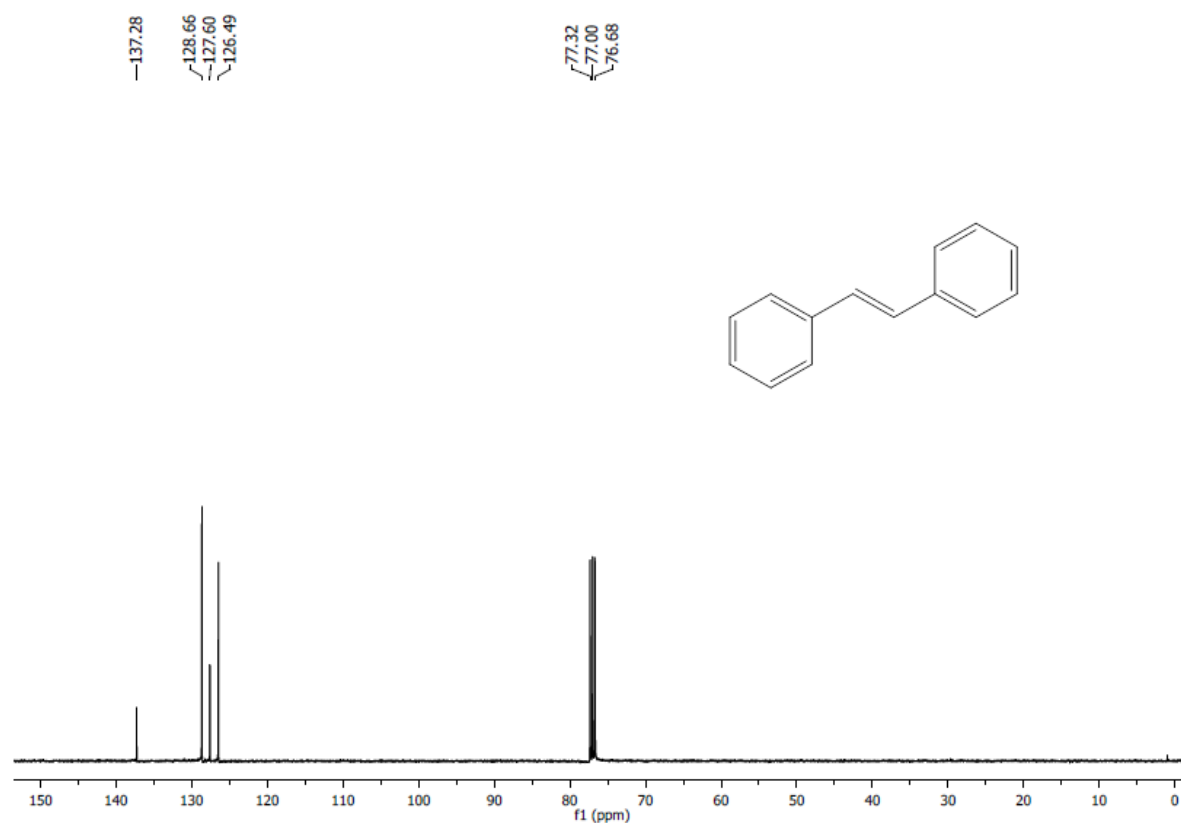

Figure S20: <sup>13</sup>C NMR spectrum of **stilbene**, recorded in CDCl<sub>3</sub> at 25 °C.

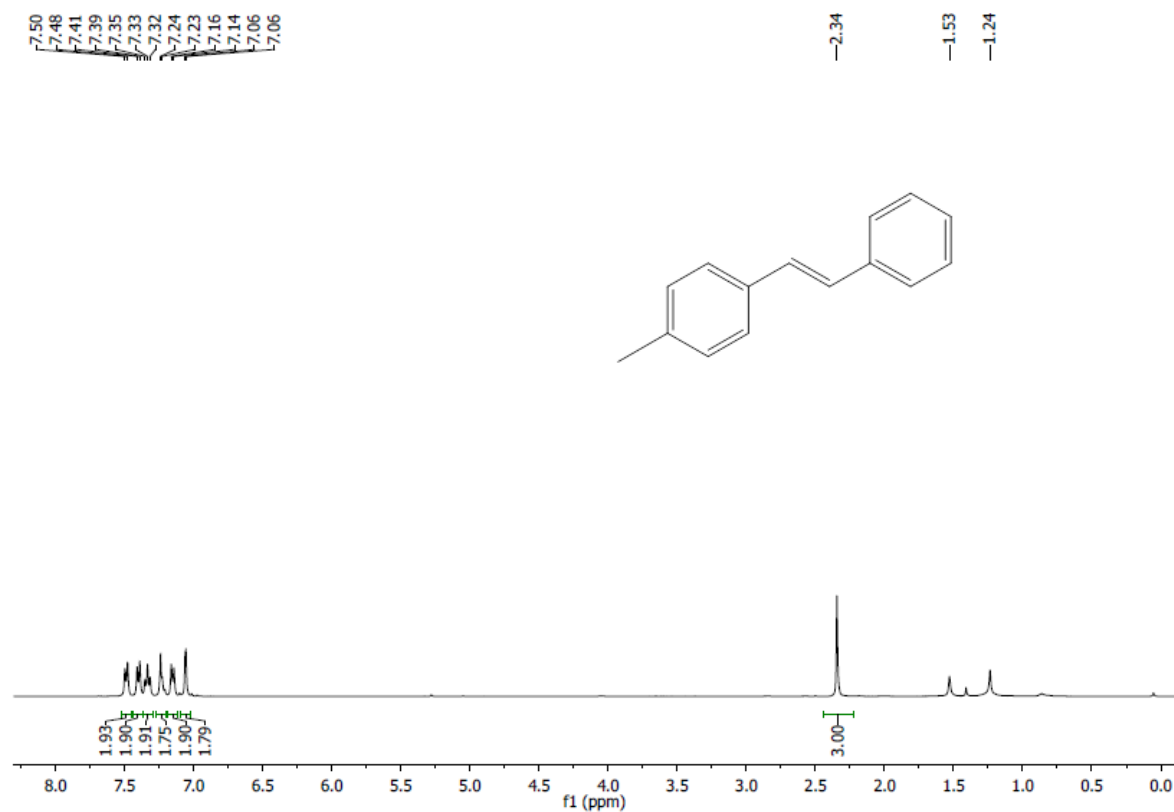

Figure S21: <sup>1</sup>H NMR spectrum of **4-methylstilbene**, recorded in CDCl<sub>3</sub> at 25 °C.

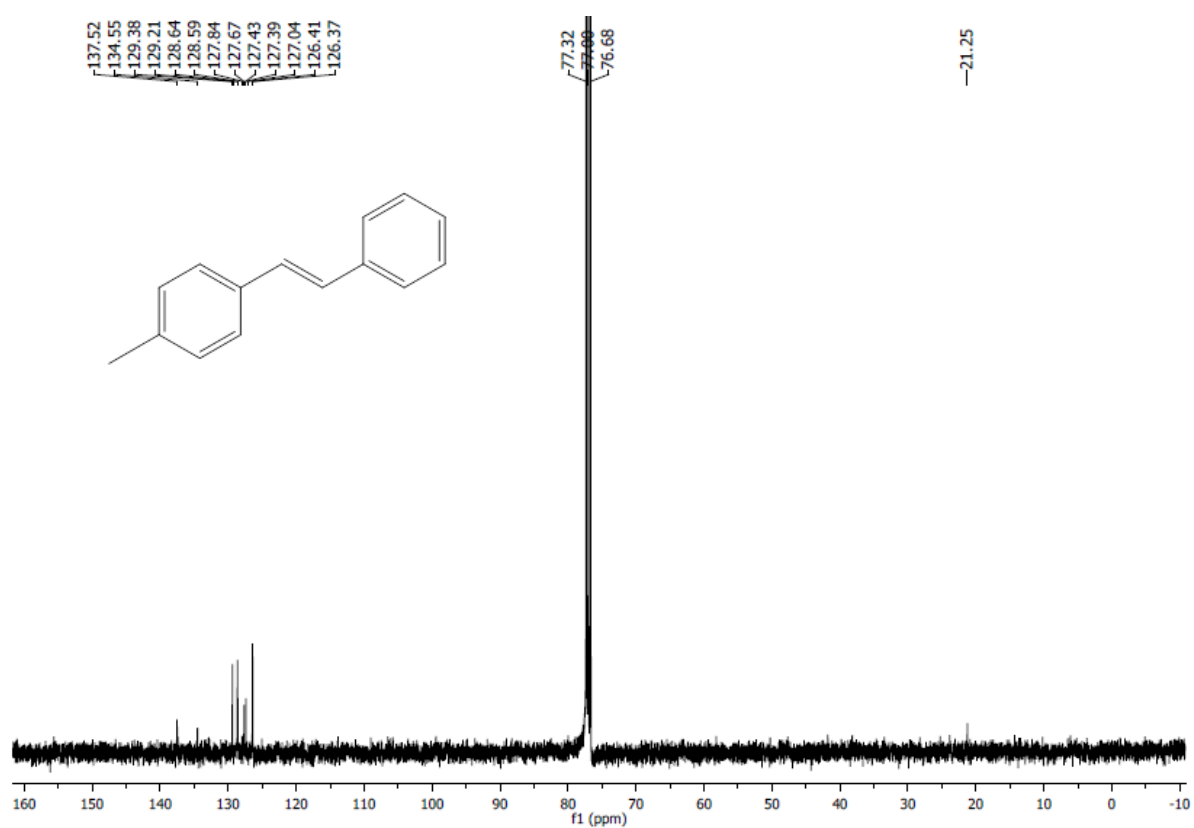

Figure S22:  $^{13}\text{C}$  NMR spectrum of 4-methylstilbene, recorded in  $\text{CDCl}_3$  at 25 °C.

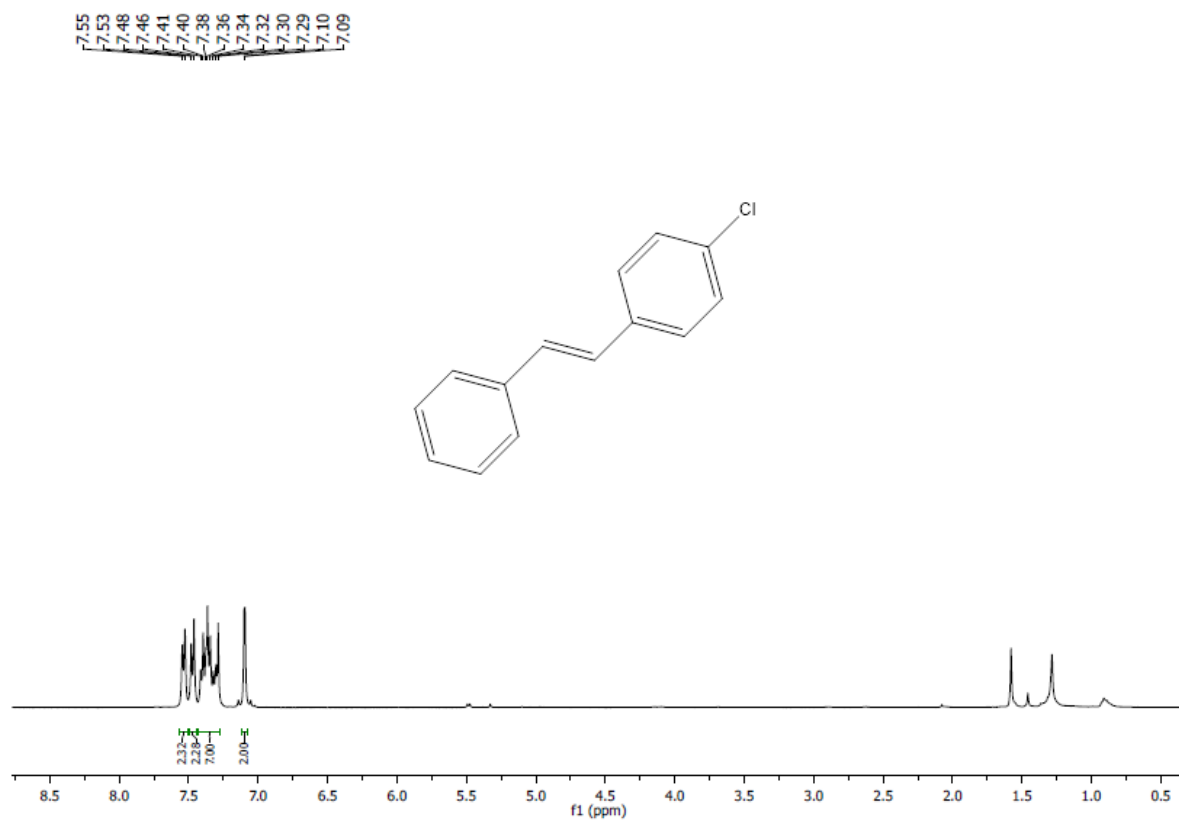

Figure S23 :  $^1\text{H}$  NMR spectrum of 4-chlorostilbene, recorded in  $\text{CDCl}_3$  at 25 °C.

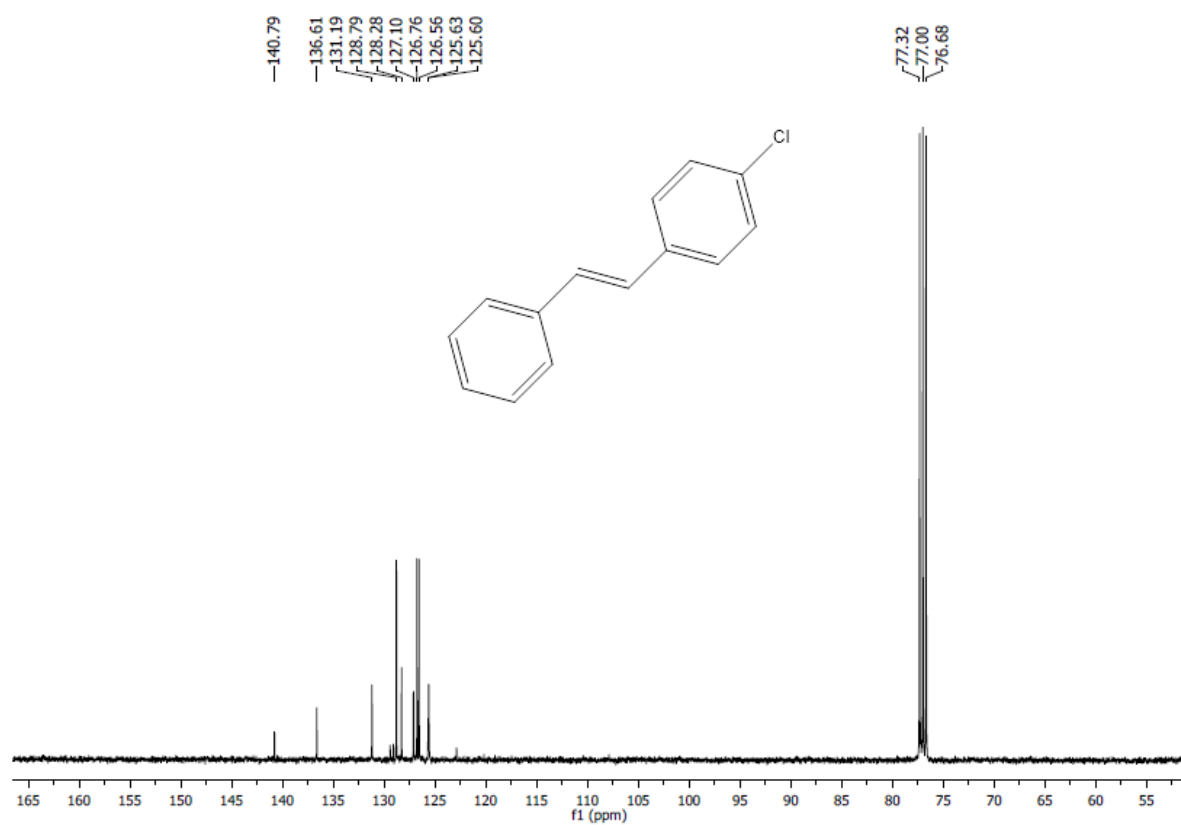

Figure S24 : <sup>13</sup>C NMR spectrum of 4-chlorostilbene, recorded in CDCl<sub>3</sub> at 25 °C.

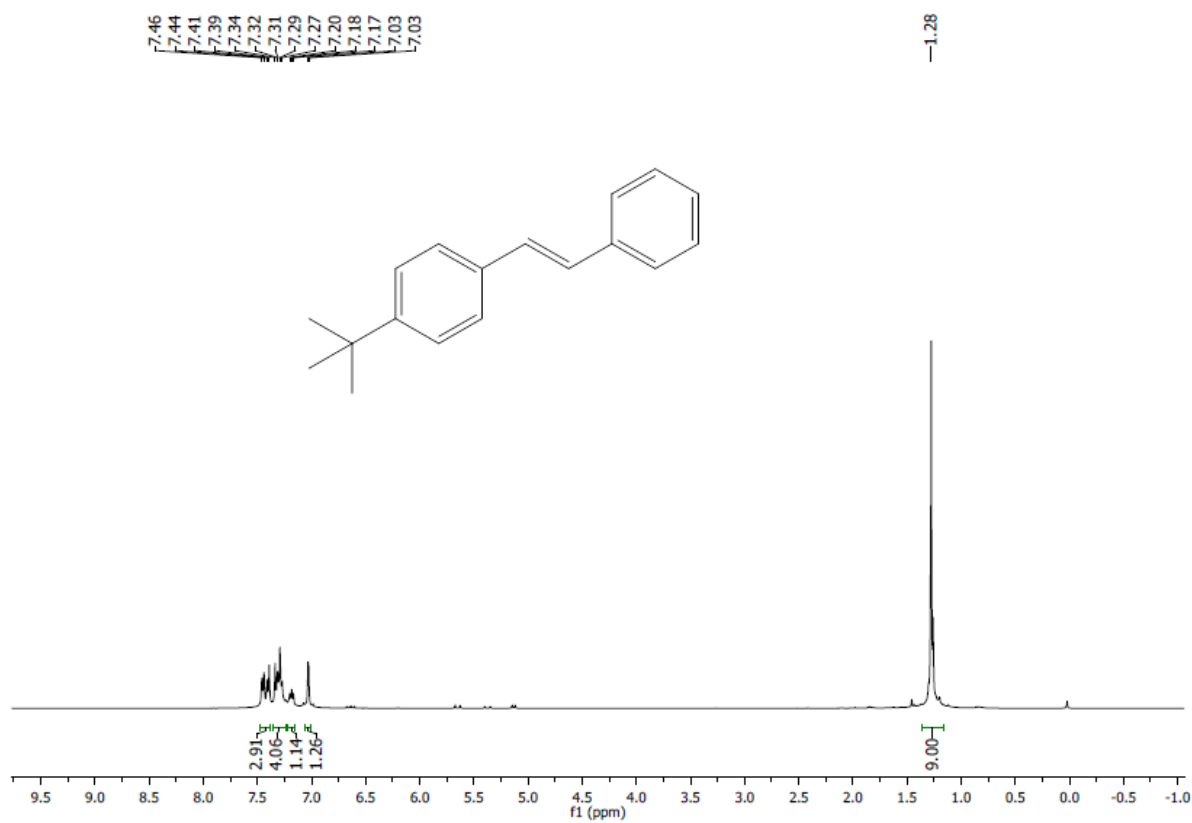

Figure S25: <sup>1</sup>H NMR spectrum of 4-tert-butylstilbene, recorded in CDCl<sub>3</sub> at 25 °C.

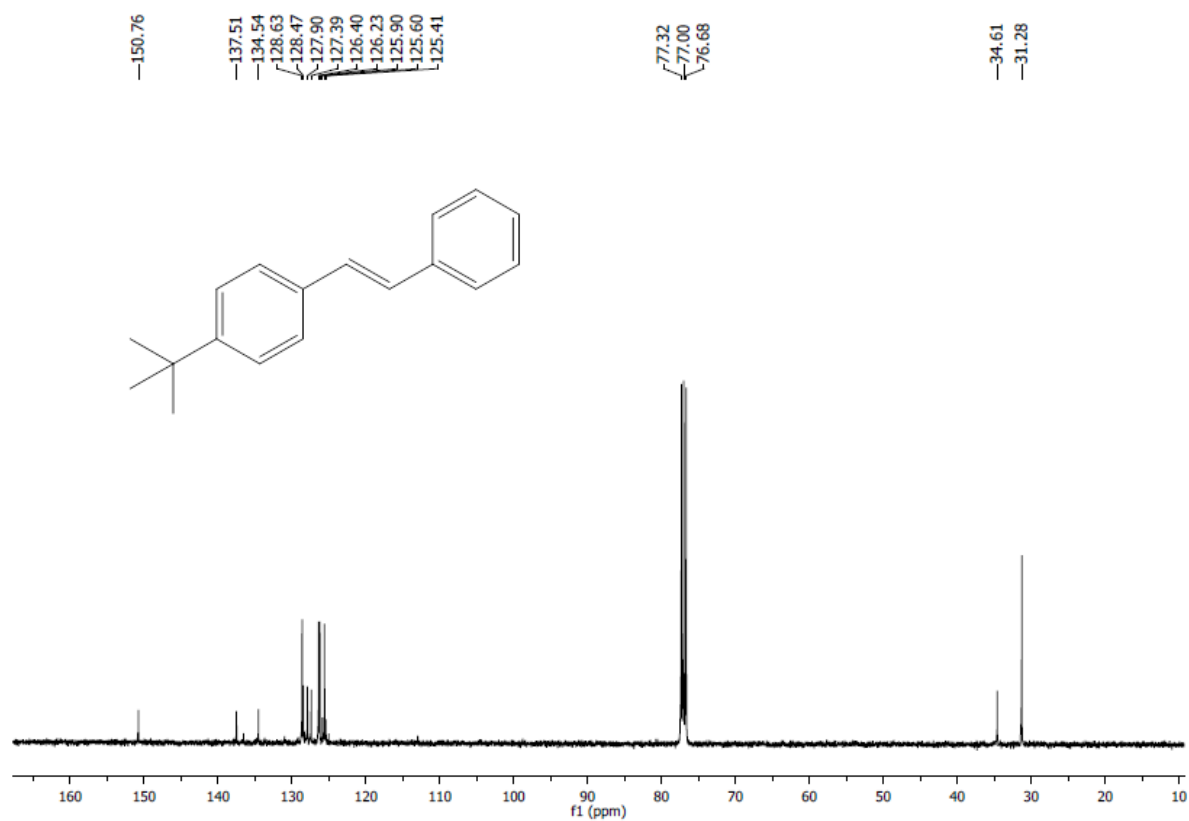

Figure S26: <sup>13</sup>C NMR spectrum of 4-*tert*-butylstilbene, recorded in CDCl<sub>3</sub> at 25 °C.

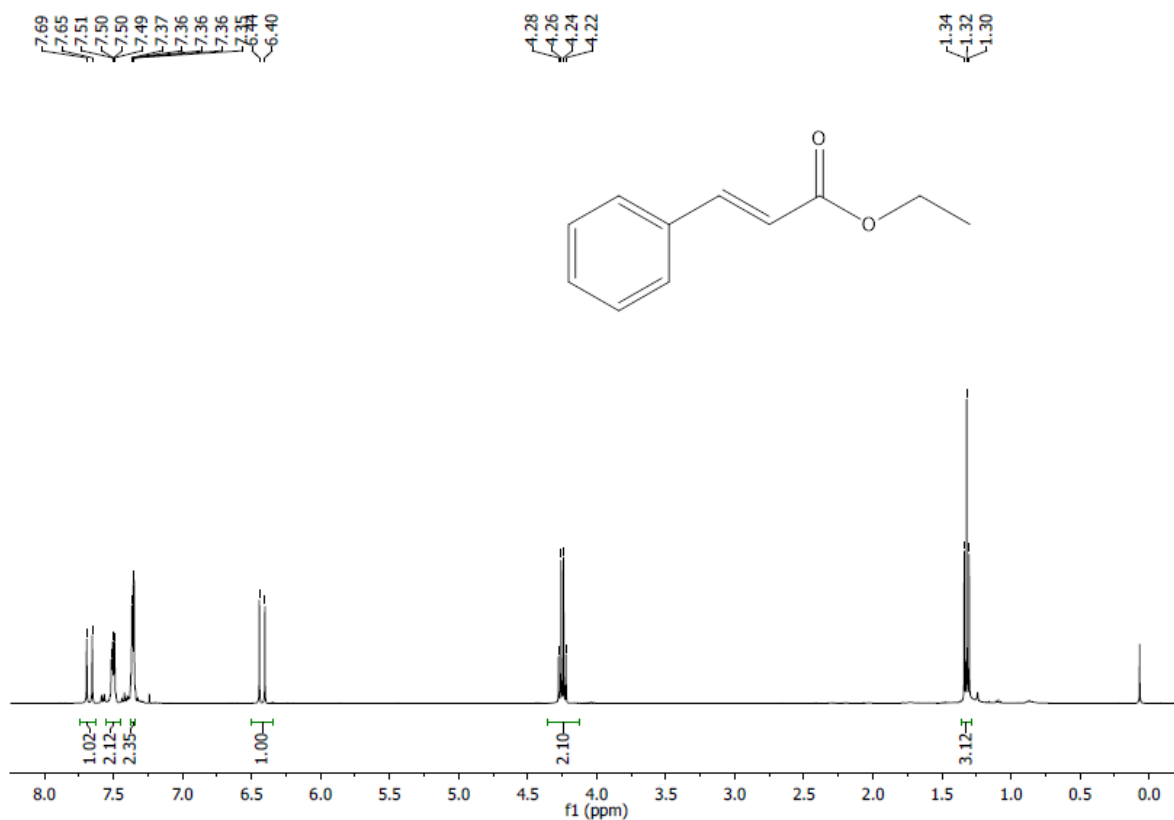

Figure S27: <sup>1</sup>H NMR spectrum of styrene ethyl acrylate, recorded in CDCl<sub>3</sub> at 25 °C.

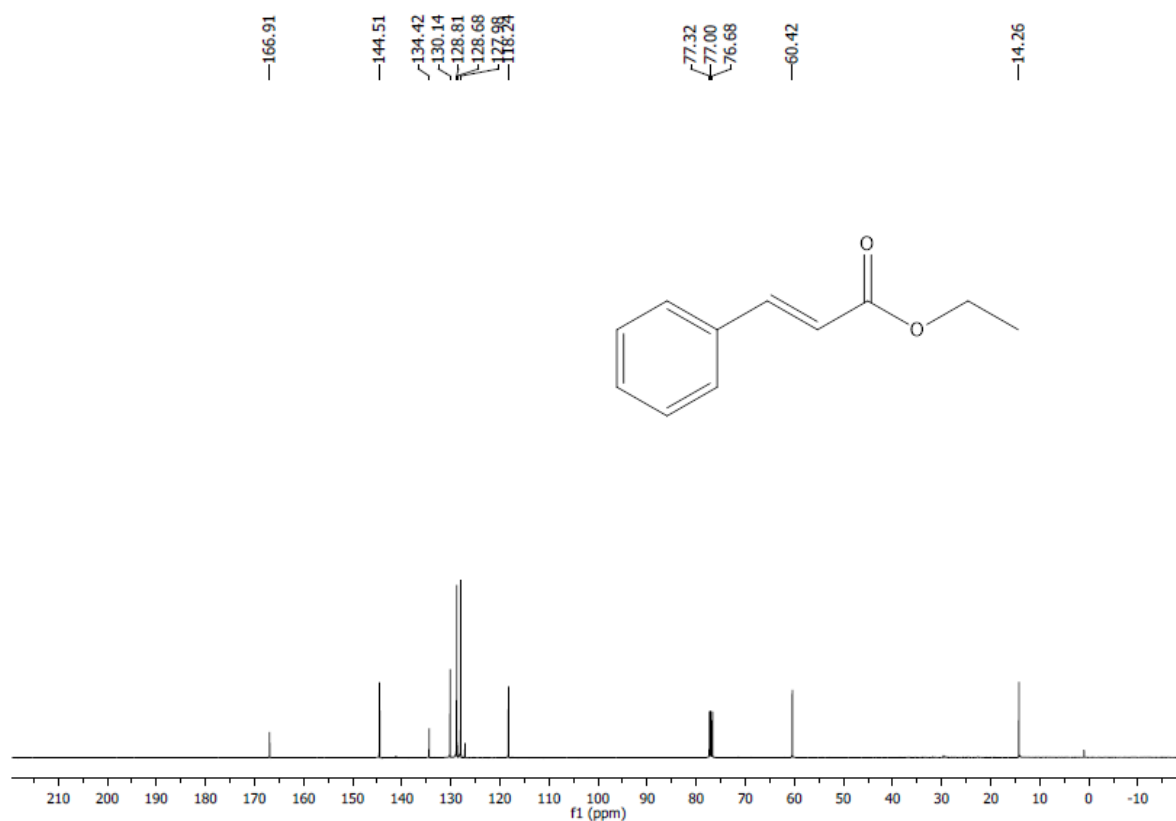

Figure S28: <sup>13</sup>C NMR spectrum of **styrene ethyl acrylate**, recorded in CDCl<sub>3</sub> at 25 °C.

## 2. Suzuki-Miyaura cross-coupling reactions product NMR spectra (<sup>1</sup>H and <sup>13</sup>C)

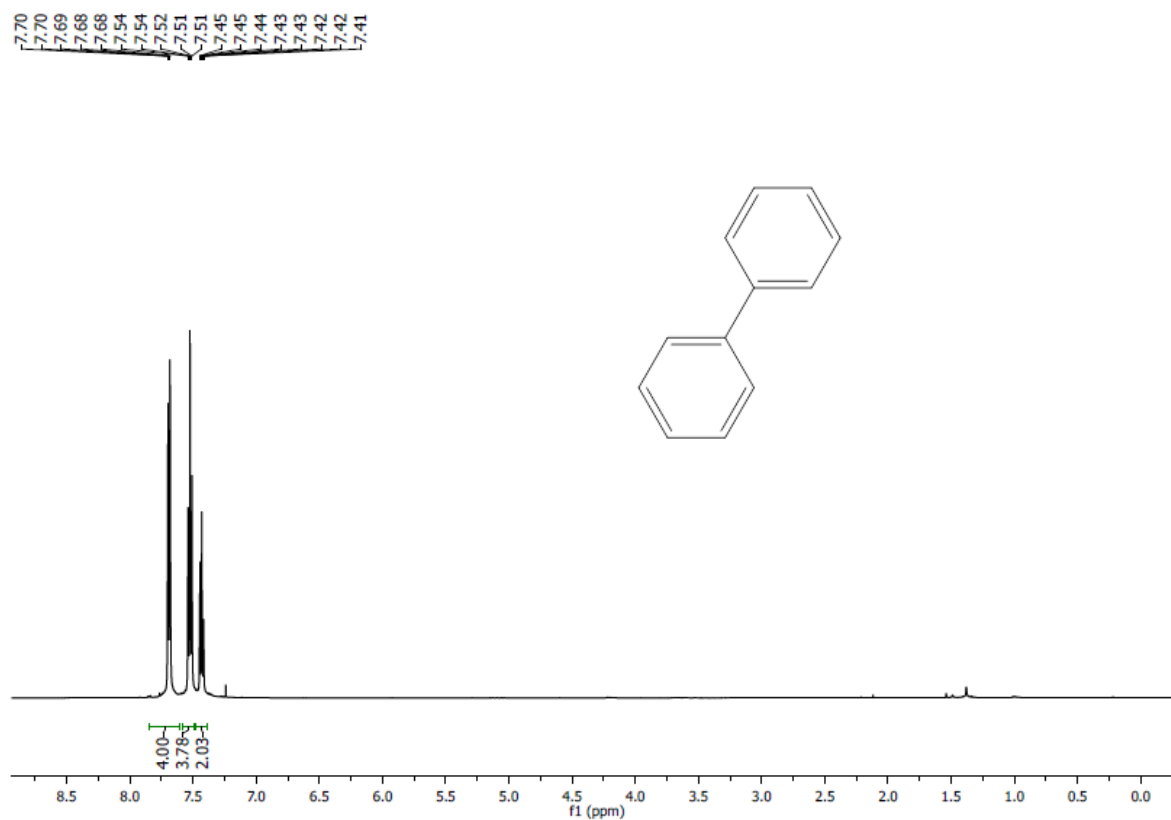

Figure S29: <sup>1</sup>H NMR spectrum of **biphenyl**, recorded in CDCl<sub>3</sub> at 25 °C.

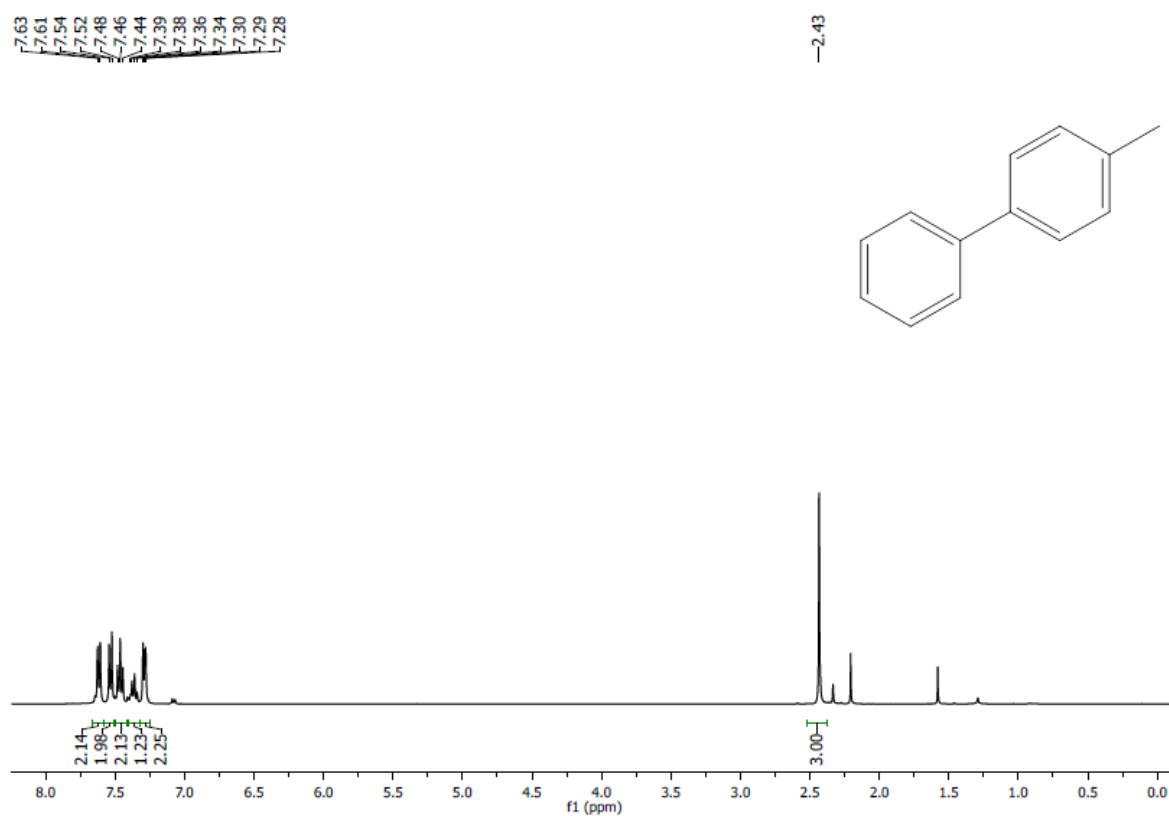

Figure S30: <sup>1</sup>H NMR spectrum of 4-methyl biphenyl, recorded in CDCl<sub>3</sub> at 25 °C.

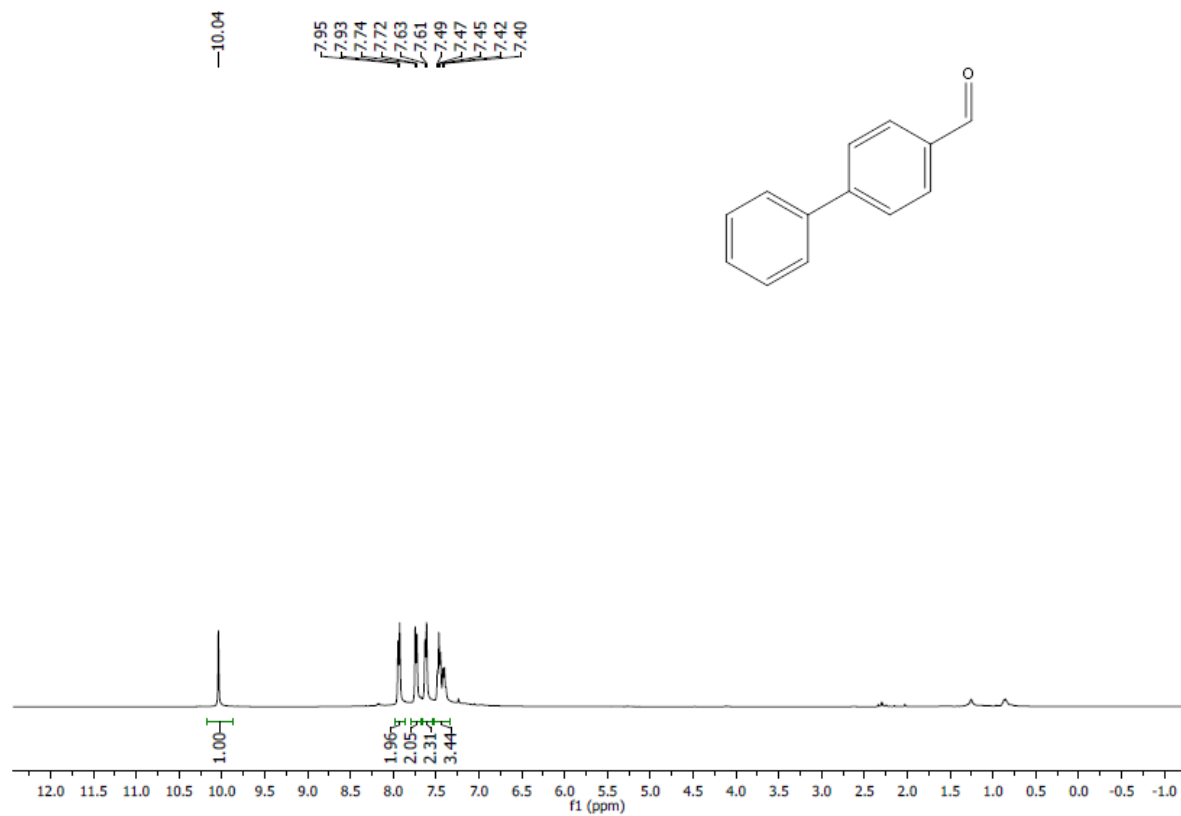

Figure S31: <sup>1</sup>H NMR spectrum of biphenyl-4-carboxaldehyde, recorded in CDCl<sub>3</sub> at 25 °C.

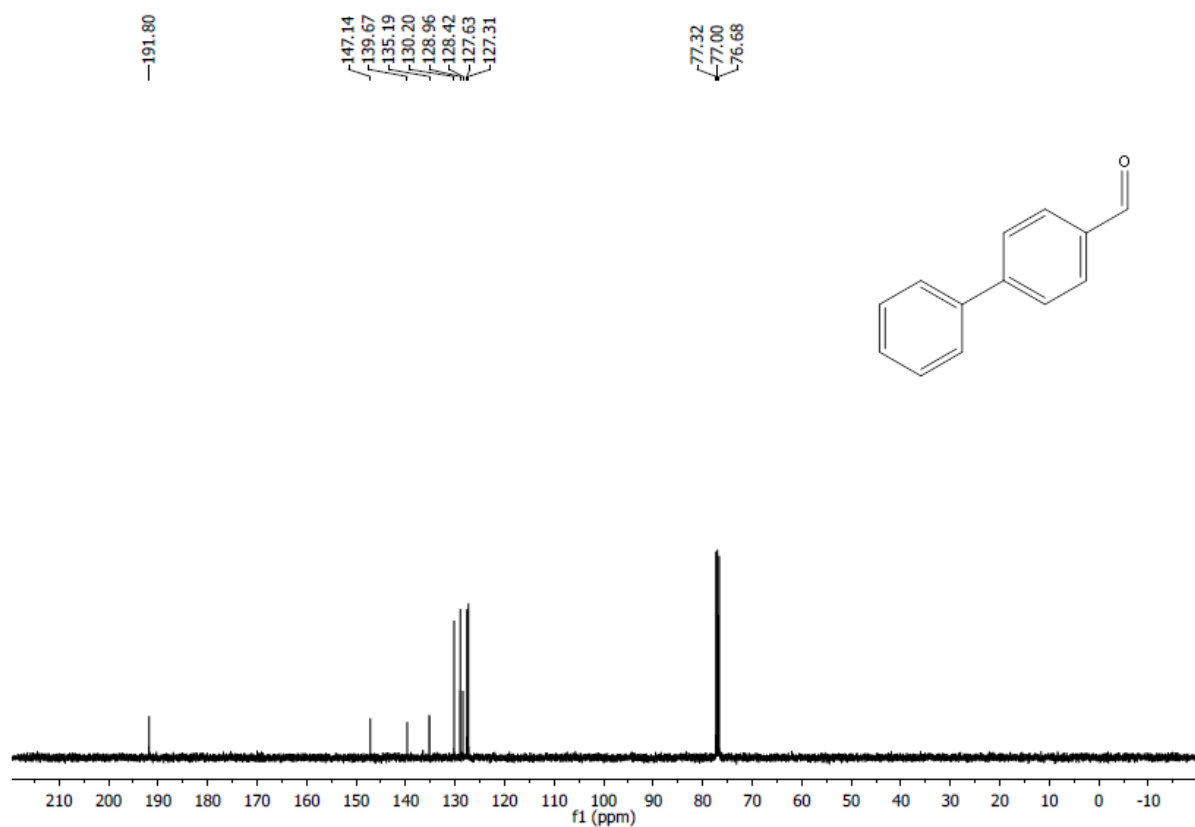

Figure S32:  $^{13}\text{C}$  NMR spectrum of biphenyl-4-carboxaldehyde, recorded in  $\text{CDCl}_3$  at 25 °C.

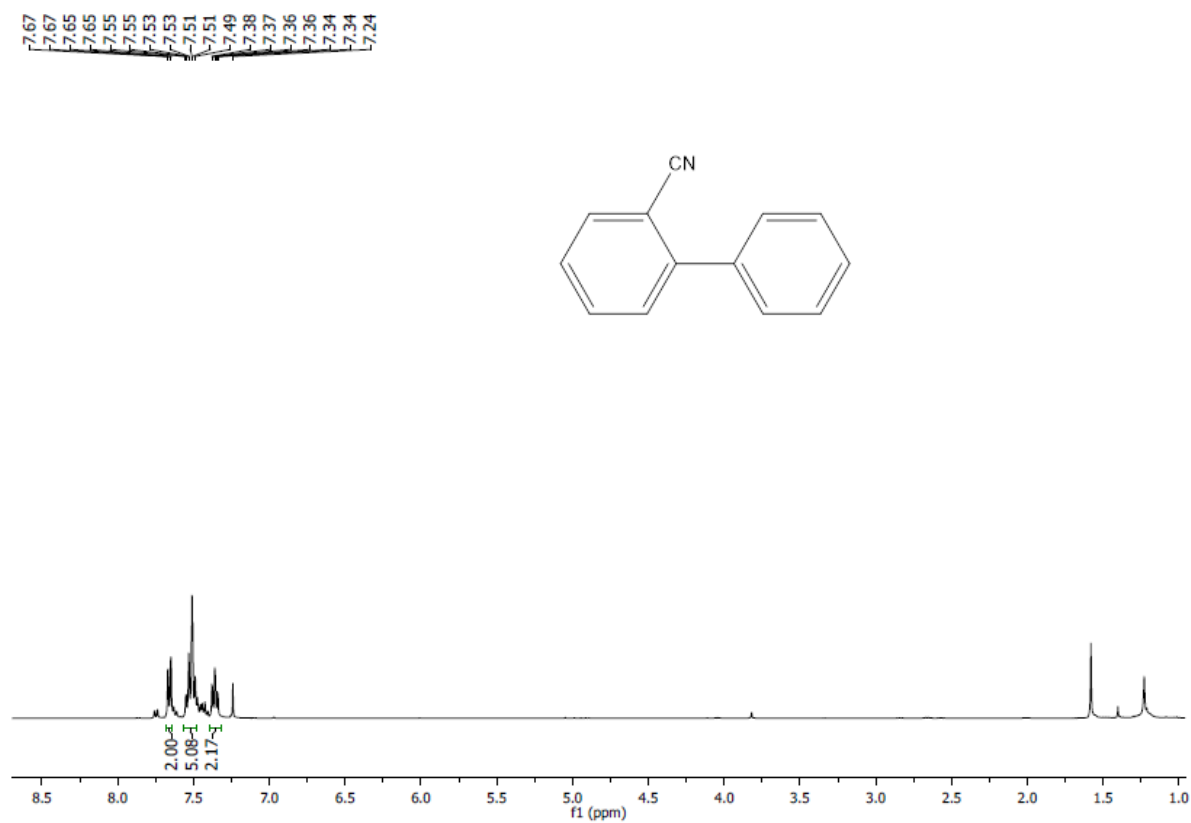

Figure S33:  $^1\text{H}$  NMR spectrum of 2-cyanobiphenyl, recorded in  $\text{CDCl}_3$  at 25 °C.

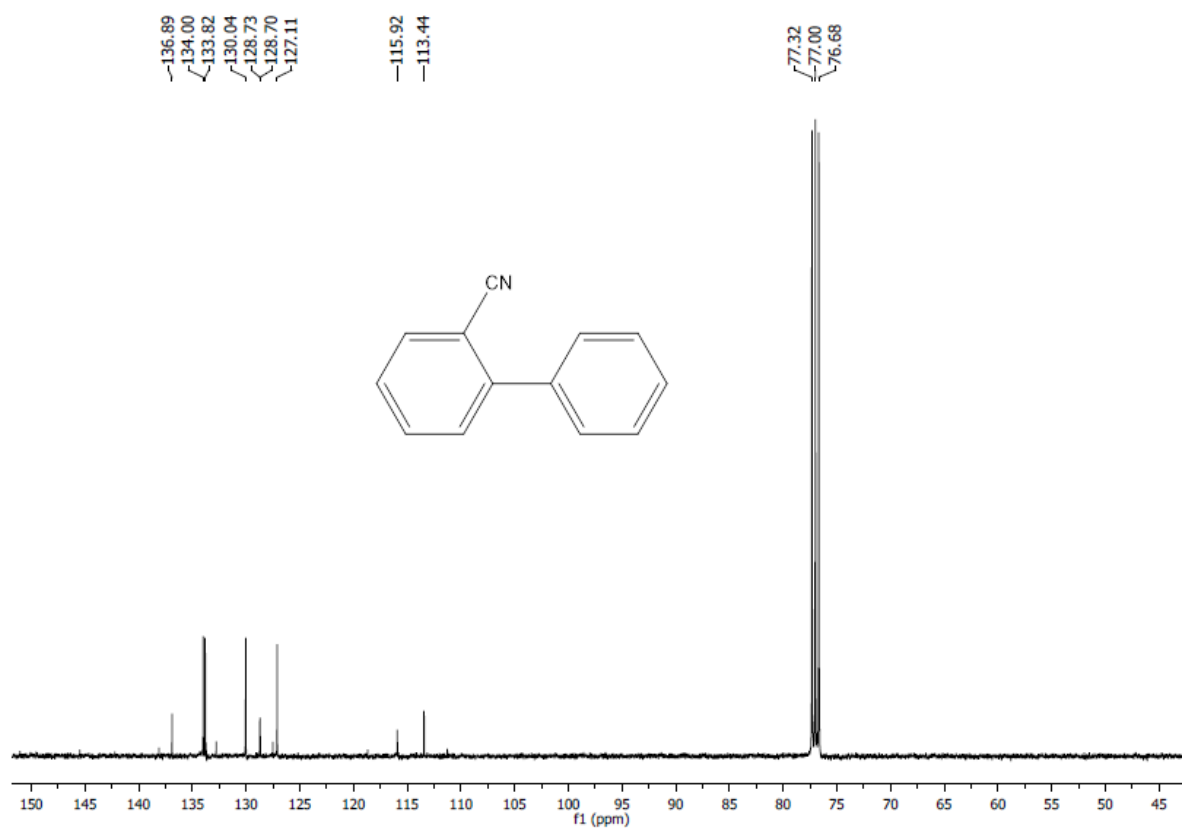

Figure S34: <sup>13</sup>C spectrum of 2-cyanobiphenyl, recorded in CDCl<sub>3</sub> at 25 °C.

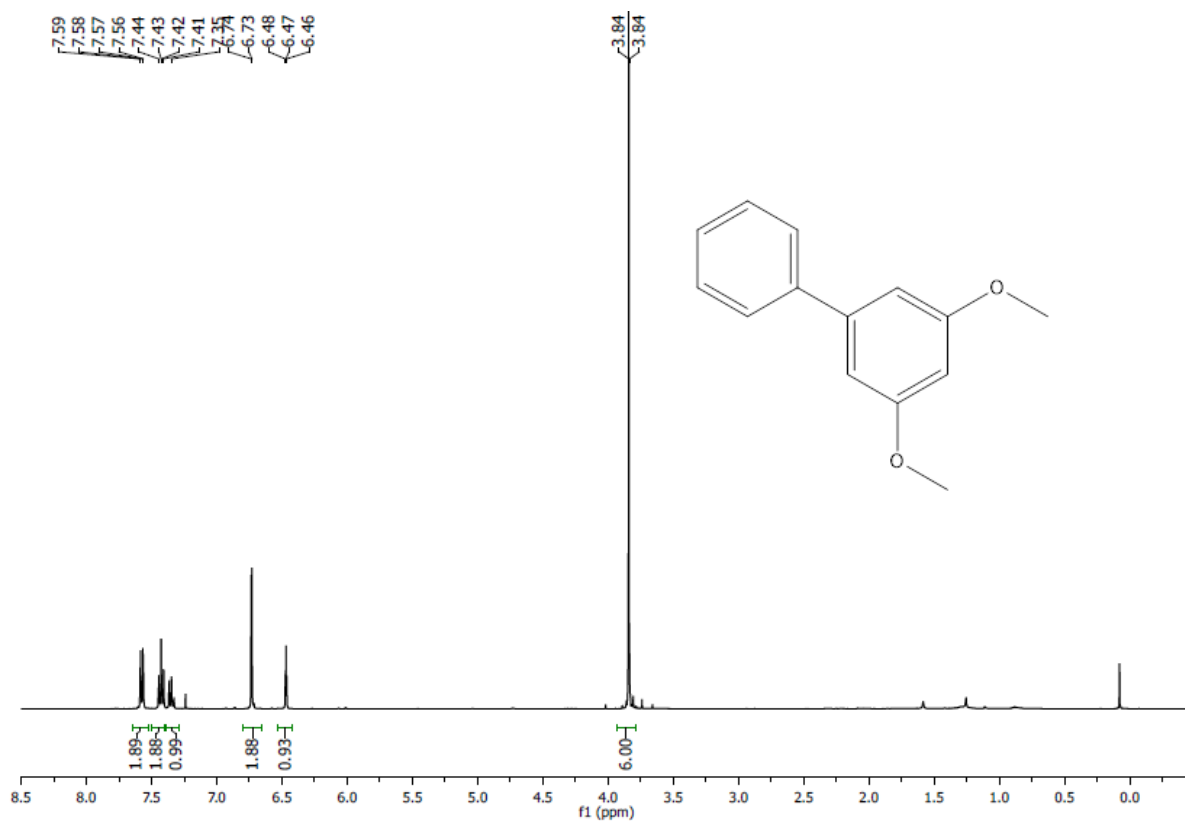

Figure S35: <sup>1</sup>H NMR spectrum of 3,5-dimethoxybiphenyl, recorded in CDCl<sub>3</sub> at 25 °C.

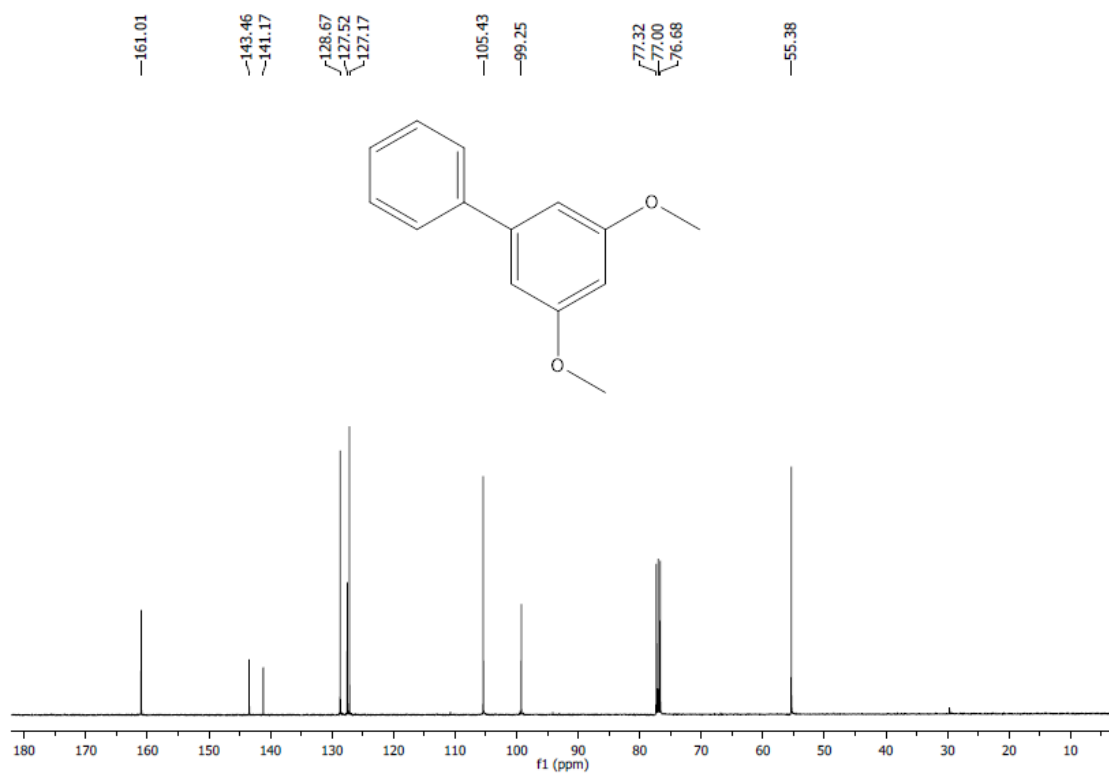

Figure S36: <sup>13</sup>C NMR spectrum of 3,5-dimethoxybiphenyl, recorded in CDCl<sub>3</sub> at 25 °C.

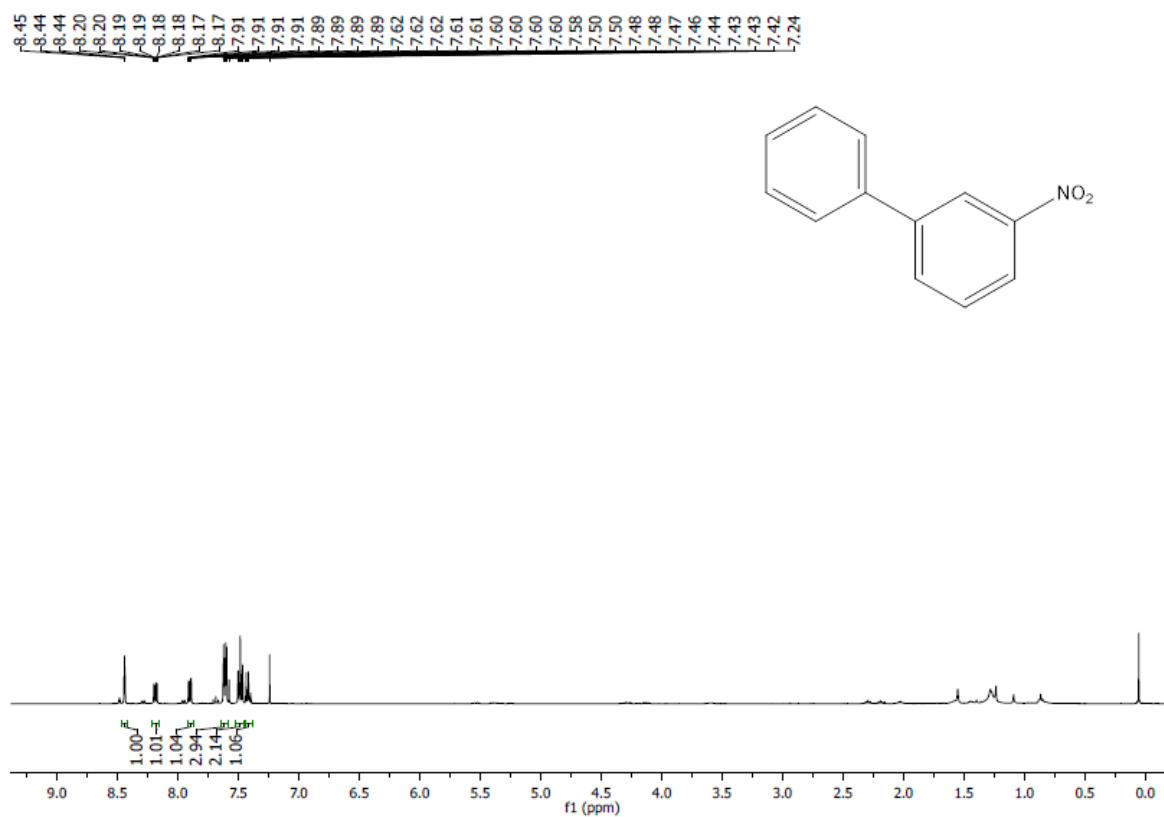

Figure S37: <sup>1</sup>H NMR spectrum of 3-nitrobiphenyl, recorded in CDCl<sub>3</sub> at 25 °C.

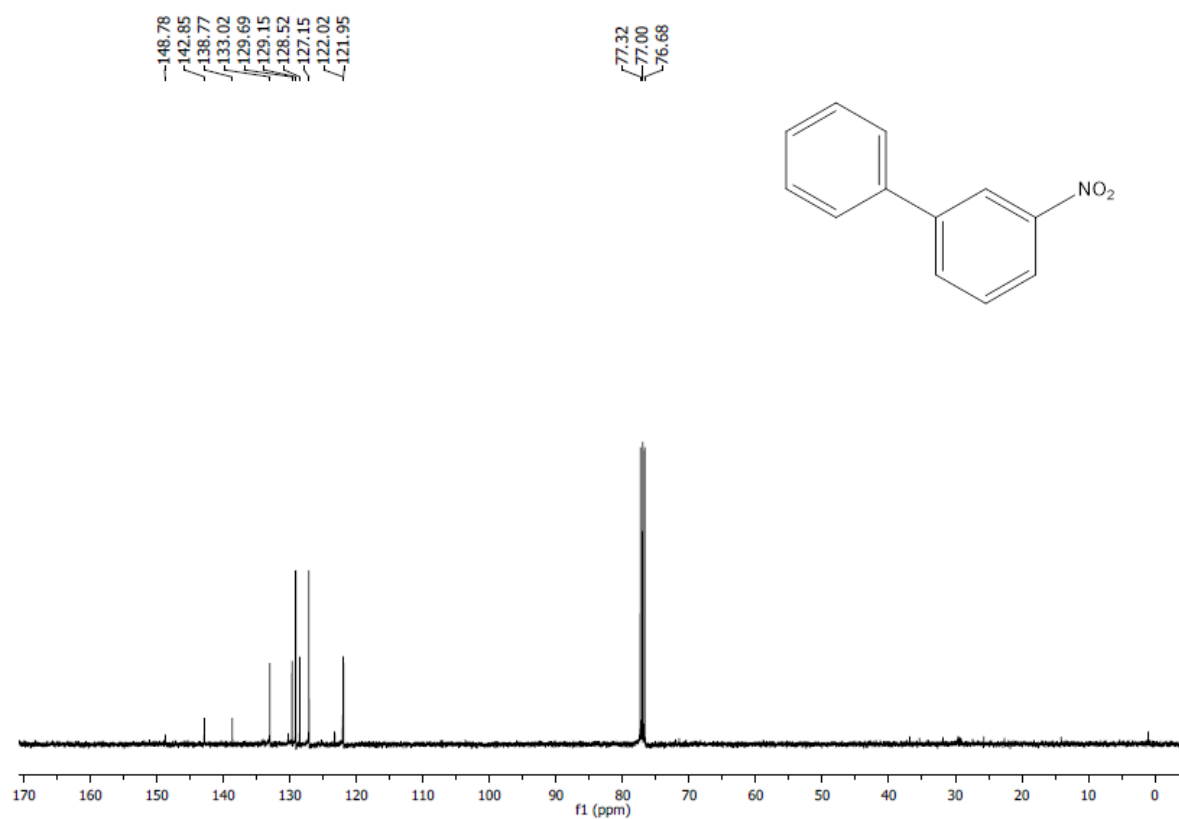

**Figure S38:**  $^{13}\text{C}$  NMR spectrum of 3-nitrobiphenyl, recorded in  $\text{CDCl}_3$  at 25 °C.
